# 1 Covid-19 genomic analysis reveals clusters of emerging sublineages within the delta variant

2 Evans K. Rono<sup>1\*, 2a,b,c</sup>

3 Author details:

4 <sup>1</sup>*Independent researcher*, 10315 Berlin, Germany: \*E-mail: ronoevan@gmail.com

5 <sup>2</sup>*Former staff as a:*

6 <sup>a</sup>Research Associate, LabClinic/MNB Health Lab GmbH, 14467 Potsdam, Germany;

7 <sup>b</sup>Scientific Staff, Vector Biology Unit, Max Plank Institute for Infection Biology, 10117  
8 Berlin, Germany; and,

9 <sup>c</sup>Lecturer, Pwani University, Department of Biochemistry and Biotechnology, P.O. Box  
10 195-80108 Kilifi, Kenya.

11

## 12 **Abstract**

13 The emerging SARS-CoV-2 variants may potentially have enhanced transmissibility and virulence  
14 of the virus, and impacts on performance of diagnostic tools and efficacy of vaccines. Genomic  
15 surveillance provides an opportunity to detect and characterize new mutations early enough for  
16 effective deployment of control strategies. Here, genomic data from Germany and United  
17 Kingdom were examined for genetic diversity by assessing gene mutations and inferring  
18 phylogeny. Delta variant sublineages were grouped into seven distinct clusters of spike mutations  
19 located in N-terminal domain of S1 region (T95I, D138H, \*D142G, Y145H and A222V) and S2  
20 region (T719I and \*N950D). The most predominant cluster was T95I mutation, with the highest  
21 frequencies (71.1% - 83.9%) in Wales, England and Scotland, and the least frequencies (8.9% -  
22 12.1%) in Germany. Two mutations, \*D142G and \*N950D here described as \*reverse mutations  
23 and T719I mutation, were largely unique to Germany. In a month, frequencies of D142G had  
24 increased from 55.6% to 67.8 % in Germany. Additionally, a cluster of D142G+T719I/T mutation  
25 went up from 27.7% to 34.1%, while a T95I+ D142G+N950D/N cluster rose from 19.2% to  
26 26.2%. Although, two distinct clusters of T95I+D138H (2.6% - 3.8%) and T95I+Y145H+A222V  
27 (2.5% - 8.5%) mutations were present in all the countries, they were most predominant in Wales  
28 and Scotland respectively. Results suggest divergent evolutionary trajectories between the clusters  
29 of D142G mutation and those of T95I mutation. These findings provide insights into underlying  
30 dynamics of evolution of the delta variant. Future studies may evaluate the epidemiological and  
31 biological implications of these sublineages.

32 SARS-CoV-2 (Severe acute respiratory syndrome coronavirus type 2) is a coronavirus that caused  
33 the Covid-19 disease outbreak in late 2019 in Wuhan China (Gorbalenya et al., 2020; F. Wu et al.,  
34 2020; Zhu et al., 2020). By early 2020, the disease had rapidly spread across the world and was  
35 declared a global pandemic (Cucinotta & Vanelli, 2020). Concurrently, the first Covid-19 genome  
36 from Wuhan, which became the official reference genome was published (F. Wu et al., 2020). The  
37 genome consists of around 30000 letters of single stranded positive sense RNA molecule (Jamil et  
38 al., 2021; Zhu et al., 2020). The genome codes for four structural proteins: S - spike; E - envelop;  
39 M - membrane and N - nucleoprotein, and eight non - structural proteins for RNA replication:  
40 Open reading frame (orf)1a, orf1ab; orf3a; orf6; orf7a; orf7b; orf8 and orf10 (Zhu et al., 2020).

41 The global spread of Covid-19 was compounded by emergence of polymorphisms in the coding  
42 sequences across its genome, which resulted in new variants of concern (VOC) (CDC, 2021a;  
43 Tegally, Wilkinson, Lessells, et al., 2021; Tegally, Wilkinson, Giovanetti, et al., 2021). Delta  
44 (B.1.617.2) variant (GISAID, 2021a) was first reported in Indian in late 2020. It spread globally  
45 and effectively outcompeted the alpha, B.1.1.7 variant (Abdool Karim & de Oliveira, 2021; CDC,  
46 2021a; RKI, 2021; WHO, 2021b). Consequently, the delta variant became the most transmissible  
47 and virulent of all the variants that have emerged to date (Fisman & Tuite, 2021; Sheikh et al.,  
48 2021). Key amino acid mutations that define the delta variant relative to the Wuhan reference  
49 genome include: - orf1ab: P4715L, P5401L, G5063S; S: T19R, G142D, E156-, F157-, R158G,  
50 L452R, T478K, D614G, P681R, D950N; orf3a: S26L; M: I82T; orf7a: V82A, T120I; orf8: D119-,  
51 F120-; N: R203M, D377Y (CoVariants, 2021).

52 Genomic surveillance and open sharing of genomic data (Elbe & Buckland-Merrett, 2017) has  
53 guided the global scientific community to monitor, detect and characterize new variants (ECDC,  
54 2021; GISAID, 2021a; Tegally, Wilkinson, Lessells, et al., 2021; Tegally, Wilkinson, Giovanetti,  
55 et al., 2021), develop vaccine (Jamil et al., 2021; WHO, 2021a), develop and continually review  
56 performance of diagnostic tools (CDC, 2021c; Wang et al., 2020) and carry out research on  
57 biological implications of the emerging mutations (Elbe & Buckland-Merrett, 2017; Tegally,  
58 Wilkinson, Lessells, et al., 2021). In addition, early detection of emerging Covid-19 mutations, is  
59 important for monitoring their prevalence and spread for prompt deployment of control measures,  
60 as well as designing experiments for assessment of efficacy of vaccines and addressing  
61 epidemiological concerns of the emerging variants (Abdool Karim & de Oliveira, 2021; ECDC,  
62 2021).

63 Here, complete genome sequences for Covid-19 delta variant originating from Germany and  
64 United Kingdom (England, Scotland, Northern Ireland and Wales) were characterized for genetic  
65 diversity. First, two easier methods for retrieving coding gene sequences and for variant calling  
66 directly from large datasets of unaligned SARS-CoV-2 complete genome sequences were  
67 streamlined to avoid doing the computationally intensive multiple sequence alignments. These  
68 methods were validated using SARS-CoV-2 genome sequences, which were downloaded from the  
69 NCBI GenBank (NCBI, 2021) and the GISAID platform (GISAID, 2021b). To this end, positions  
70 of the mutations in each variant were renamed with respect to positions of unaligned self  
71 (individual) variant, and not relative to the reference genome (Table 1). Validated methods were  
72 applied to analyze a total of 169315 SARS-CoV-2 complete genome sequences that were  
73 submitted to the GISAID platform from 2021.07.23 to 2021.08.30.

74 Spike gene sequences were retrieved from the unaligned genome sequences and processed to  
75 95684 high quality sequences by cleaning to remove ambiguous base calls. By exploiting the  
76 spike marker mutations that define each variant, whose positions were renamed in Table 1, variant  
77 calling of 13 different variants was executed. The delta variant with 92.4%, 88418 sequences, was  
78 the most dominant variant (Fig.1a). The B.1.1.7 alpha variant had 1%, 991 sequences. Specific  
79 positions of mutations in the delta variant were 95, 138, 142, 152, 145, and 222 (Fig.1b). A total  
80 of 5547 out of 6193 sequences, which were not called to any of the 13 variants, and had been  
81 categorized as ‘other’, were found to be of the delta variant lineage. This group of sequences had  
82 key positions with mutations at 95, 142, 222, 719 and 950 (Fig. S1a), while the delta variant with  
83 88418 sequences, had positions 95,138, 145 and 222 (Fig. S1b). Amino acid spike substitutions at  
84 these positions were T95I, D138H, D142G, Y145H, A222V, T719I and N950D (Table S1). Of  
85 these, \*D142G and/or \*N950D are suspected to be \*reverse mutation changes from G142D and/or  
86 D950N in the parental delta variant back to the wild type amino acids, which are present in the  
87 Wuhan reference genome.

88 To further interrogate these amino acid substitutions, the genome sequences of the delta variant  
89 were clustered into 6 main spike mutation subgroups (Table S1). The delta variant (Fig. 1b) was  
90 split into five subgroups: Parental delta without T95I, Y145H and A222V mutations (n = 15324,  
91 16.5%); delta with T95I mutations (n = 75307, 81.2%); delta with A222V mutations (n = 3749,  
92 4%); delta with Y145H mutations (n = 1664, 1.8%); and delta with D138H mutations (n = 1314,  
93 1.4%). The ‘other’ group (Fig.S1a) was left as a subgroup: Delta with D142G reverse mutation (n  
94 = 5508, 6%). For easy of description in this study, these subgroups were designated as follows;

95 delta, delta2, delta3, delta4, delta5 and delta6 respectively (Table S1). A combination of T95I and  
96 A222V spike substitutions were detected in delta2, delta4 and delta5. Delta3 with D142G reverse  
97 mutations segregated further into two main subgroups with T95I and A222V mutations. Notably,  
98 T719I new mutation was present in delta3. Delta6 had T95I mutation in which Y145H and A222V  
99 sites were conserved.

100 To reveal the extend of mutation changes in the rest of the SARS-CoV-2 genes, similar analyses  
101 were extended to all the gene coding sequences in each of the six subgroups (Table S1). All the  
102 key mutations that define the parental delta variant in orf1ab, spike, orf3a, M, orf7a, and N genes  
103 were present in all the delta subgroups. The orf6 protein in all the delta sequences were the most  
104 conserved followed by the E protein. Orf1ab, orf10, Orf7b and N genes showed signatures of new  
105 mutations. Although orf10 protein was the third most conserved gene, it showed emerging  
106 mutation sites at positions L16P in delta2 and T38I in delta3 and delta5. Orf1ab had fixed  
107 substitutions at positions A1306S, P2046L, P2287S, A2529V, V2930L, T3255I, T3646A and  
108 A6319V. New fixed substitutions in Orf7b and N genes at positions T40I and G215C respectively  
109 were observed.

110 Both orf8 and orf7a protein sequences in the reference genome, are 121 amino acid long (F. Wu et  
111 al., 2020). However, orf8 and Orf7a gene sequences in these delta sublineages were characterized  
112 by complex polymorphisms that included substitutions, deletions and stop codons. Some of the  
113 orf8 sequences had deletions at positions G66, S67, F120 and I121, and stop codons (!) in many  
114 positions such as Q18!, E19!, and E106!. Majority of orf8 sequences, had mutations at positions  
115 D119I, F120! and I121T almost at the levels of fixation in the gene. In addition, orf8 had the  
116 lowest sequencing coverage of its genome, which forced some sequences ( $n > 896$ ) to be discarded  
117 from the analysis, suggesting that increasing polymorphism in this gene may be responsible for  
118 the low sequencing coverage. In orf7a protein sequences, there were deletions at positions F63 and  
119 V104, and stop codons in many positions including G38!, Q62!, Q90!, E91!, E92!, Q94! and E95!.

120 To check the extend of geographical spread of the individual mutations, the seven spike single  
121 mutations; T95I, D138H, D142G, Y145H, A222V, T719I and N950D were mapped to their  
122 respective countries (Fig. 2a). As sequencing may not be random and/or standardized across  
123 nations, different nations may have under- and/or over representation of genome sequences. To  
124 correct for over- and/or under representation of genome sequences in some countries, frequencies  
125 of the mutations were calculated relative to the total numbers of all the sequences coming from the  
126 respective countries.

127 Delta\_ D142G and delta\_ N950D mutations were absent in Scotland. Delta\_ N950D mutation was  
128 also not detected in Northern Ireland. Delta\_ T95I mutations were the most prevalent mutation  
129 with highest frequencies being observed in Wales (83.7%), followed by England (81%) and  
130 Scotland (76.9%), while the lowest frequencies (9.1%) were observed in Germany. Interestingly,  
131 the highest frequencies of the delta\_ D142G (55.6%) and delta\_ N950D (4.3%) ‘reverse’  
132 mutations as well as T719I (4.6%) were most prevalent in Germany, suggesting that these  
133 mutations may be driven by selective pressures different from those of T95I mutations in England,  
134 Scotland and Wales.

135 To understand genetic diversity of among these seven delta sublineages, phylogenetic clustering of  
136 mutations was inferred (Fig. 2b). First, representative sequences for phylogenetic analysis were  
137 selected. To do this, all the genome sequences for each of the seven groups were processed and  
138 resolved to haplotype level (Table S2). From each group, the first ten sequences representing ten  
139 of the most abundant haplotypes (with exception of N950D with only 4 representatives) in each  
140 group were selected for phylogenetic analyses (Table S2). Results of maximum likelihood  
141 phylogenetic analysis showed seven distinct clusters of mutations (Fig. 2 b). Of these, clusters of  
142 delta, delta+T95I, delta+T95I+D138H, delta+T95I+Y145H+A222V mutations were detected in all  
143 the five countries. Signatures of Delta+D142G+A222V+N950D/N mutations were present in  
144 England, Germany and Northern Ireland. Clusters of Delta+D142G+T719I/T and  
145 delta+T95I+D142G+N950D/N mutations were present in England, Germany, Northern Ireland  
146 and Wales. Since the start of the pandemic, the SARS-CoV-2 has been evolving differently in  
147 various jurisdictions worldwide (WHO, 2021b).

148 To track how frequencies of these mutations may have tilted over the previous one-month period,  
149 similar analyses was done on a new dataset consisting of 214766 complete genome sequences  
150 submitted to the GISAID platform from 31.08.2021 to 2021.09.30. Frequencies of mutations were  
151 compared between the first submission (2021.07.23 and 2021.08.30) and the second submission  
152 (31.08.2021 and 2021.09.30) data sets (Fig. 3a and Fig. 3b). Synonymous mutations at positions  
153 163A, 410I, 856N, 1122V, 1147S and 1264V were observed (Fig. S2a). The same positions of  
154 non-synonymous mutations at positions T95I, D138H, D142G, Y145H and A222V, which were  
155 revealed in the first dataset, were still present in the second dataset (Fig. S2a, Fig. S2b).  
156 Consistently, the T95I cluster of mutations in Wales, England, and Scotland maintained the  
157 highest frequencies in the ranges between 71.2% and 80.8%. Delta+T95I+D142G+N950D/N  
158 mutations in Germany had increased from 19.2% to 26.2%. In addition, Delta+D142G+T719I/T in

159 Germany had also increased from 27.7% and 34.1%. Single delta\_D142G mutation, in overall,  
160 increased in frequency from 55.7% (Fig. 2a) to 67.8% (Fig. S3a). In both submissions, England  
161 had the highest number of sequences, while sample size from Northern Ireland in the second  
162 submission suffered significantly from the lowest (N = 76) representation of sequences (Fig. S3b),  
163 which was a drastic drop from 1085 sequences in the first submission (Fig. 2a).

164 These results, considering good sample sizes of genome sequences analyzed in this study, and the  
165 observed wide spread of these mutations, may suggest that natural selection and not chance events  
166 drives the emergence of these mutations (Lauring & Hodcroft, 2021). Mutations: T95I, D138H,  
167 D142G, Y145H and A222V are clustered in the N-terminal domain (NTD) in S1 region (Fig.  
168 S3b). The T719I position is located in the S2 region just before the fusion peptide, while N950D is  
169 located in the central helix in the S2 domain (Lan et al., 2020) (Fig. S2b). Human neutralizing  
170 antibody recognizes an epitope of the NTD suggesting that it has some immunogenic properties  
171 (Chi et al., 2020; Liu et al., 2020). Mutations at spike involving T95I, was reported in Mu -  
172 B.1.621 variant in Colombia, alongside other mutations located in the NTD (ins146N, Y144T and  
173 Y145S), and receptor binding domain (RBD) (R346K, E484K and N501Y) and S1/S2 cleavage  
174 region (P681H) mutations (Laiton-Donato et al., 2021). Many other VOC variants of interest  
175 (VOI) such as Eta - B.1.525, Iota - B.1.526, also share T95I mutations (CoVariants, 2021). P681H  
176 substitution was also present in B.I.1.7 alpha variant but position 145 was deleted (WHO, 2021b),  
177 suggesting that positions 95 and 145 in the NTD, may be under high selective pressures.  
178 Worldwide, there has been a significant reduction in frequencies of many of VOC, including the  
179 B.1.1.7 alpha variant. Due to this, USA recently de-escalated their classification and definition  
180 from VOC or VOI to variants being monitored (VBM) (CDC, 2021b).

181 Indeed, spike protein has been used for vaccine development (Jamil et al., 2021) because it  
182 induces neutralizing antibodies (K. Wu et al., 2021). Delta variant, however, has ability to evade  
183 the neutralizing antibodies (Baral et al., 2021). Delta variant mutations at T478K and L452R  
184 located in RBD and P681R (Fig. S2b), enhance virus transmissibility (Starr et al., 2021).  
185 Specifically, P681R mutation enhances cleavage of the protein at the S1/S2 site (Peacock et al.,  
186 2021), while L452R/T478K alter conformation of the RBD (Baral et al., 2021) and enhance  
187 affinity to bind to mink angiotensin-converting enzyme 2 (ACE2) receptor (Baral et al., 2021;  
188 Motozono et al., 2021). Although, vaccinated people may still get infected with the delta variant,  
189 vaccination prevents severe illness and critical hospitalization (Sheikh et al., 2021; Zaveri et al.,  
190 2021). Mutations may increase or reduce fitness and adaptiveness (Plante et al., 2021) by

191 influencing its transmissibility and virulence (Lauring & Hodcroft, 2021; Li et al., 2020). Spike  
192 D614G mutation emerged during the early periods of the pandemic, and was rapidly fixed  
193 (Lauring & Hodcroft, 2021). The D614G enhances the activity of proteases at the S1/S2 cleavage  
194 site (Gobeil et al., 2021), suggesting that it works in synergy with P681R mutation to promote  
195 higher rates of virulence (Becerra-Flores & Cardozo, 2020; Korber et al., 2020) and efficiency in  
196 transmission (Hou et al., 2020). In this context, the T95I mutation being the most predominant  
197 mutation with a wide geographical spread, may suggest that it may confer more transmissible  
198 ability or fitness and/or adaptiveness to the virus (Liu et al., 2020). Evidently, the reducing  
199 frequencies of the parental delta variant observed in this survey, may be a pointer that the parental  
200 delta may soon be phased out by its emerging descendants, especially by T95I and/or \*D142G  
201 mutations. These T95I and D142G mutations appear to evolve independently as seen by their  
202 clustering with D138H, Y145H+A222V, D142G+N950D/N and D142G+T719I/T. Notably,  
203 mutations in N gene and non- structural genes; orf1ab, orf3a, orf7a and orf8 genes (Table S1),  
204 revealed evident signatures of polymorphic differences, which may have some consequences in  
205 viral packaging and replication. Whether these substitutions are associated with roles of  
206 L452R/T478K and/or D614G/P681R mutations remains unknown. In addition, outstanding  
207 questions on adaptive benefits of the new mutations, and the implications they have on  
208 transmissibility, antigenicity, or virulence of the virus remain to be understood.

209 In summary, the unique splitting of delta variant into distinct clusters of emerging delta sub-  
210 lineages may be hypothesized to mean that the parental delta variant, may be evolving into new  
211 genetic variants. A speculation, that future research needs to test on the basis of their phenotype  
212 differences in transmissibility and/or epidemiology in real SARS-CoV-2 public health infections.  
213 These findings provide insights into the current, and possible future dynamics of evolution of the  
214 delta variant in the face of emerging sublineages under different selective pressures, including  
215 those driven by the vaccinated populace. This study was limited to assessing emergence and  
216 characterization of sublineages of the delta variant in a limited geographical region. Future  
217 research may highlight epidemiological and functional impacts of these clusters of mutations,  
218 especially the single mutations that are widespread and are increasing in frequencies and/or are  
219 persisting in the circulation.

220 **Methods** (see additional information)

221 *1. Sample sizes and origin of SARS-CoV-2 genome sequences*

222 *2. Streamlining the retrieval of SARS-CoV-2 gene sequences*

223 *3. Easing the approach of variant calling*

224 *4. Frequency of codons or amino acids per position*

225 *5. Visualizing positions of mutations*

226 *6. Grouping of single mutations*

227 *7. Phylogenetic analysis*

228 *8. Clustering, mapping and tracking of mutations*

229 **Additional information**

230 Methods, supplementary figures (Fig. S1, S2 and S3) and supplementary tables (Table S1 and S2)  
231 are included at end of the manuscript.

232 **Data availability**

233 Under terms and conditions of use, genome sequences used in this study cannot be circulated here  
234 or elsewhere. Supplementary data files: Data 1 (Fig. 1 and Fig. S1); Data 2 to data 12 (Table S1);  
235 and Data 13 (Table S2, Fig. 2, Fig. 3, Fig. S2 and Fig. S3) are provided. Any other additional data  
236 and methods are available from the author upon request.

237 **Funding**

238 The author did not receive any funding towards this work.

239 **Disclosure statement**

240 The author has no conflict of interest to disclose.

241 **Author contributions**

242 The author conceived the study, designed and validated the methods, downloaded and analyzed  
243 the data, prepared and submitted the manuscript.

244 **Acknowledgements**

245 Many thanks to all the researchers and the five Nations: England, Germany, Northern Ireland,  
246 Scotland and Wales, for investing in SARS-CoV-2 genome sequencing and openly sharing their  
247 genomic data via the GISAID platform. Great appreciation to the NCBI and the GISAID for the  
248 access of the SARS-CoV-2 genomic data.

249



250

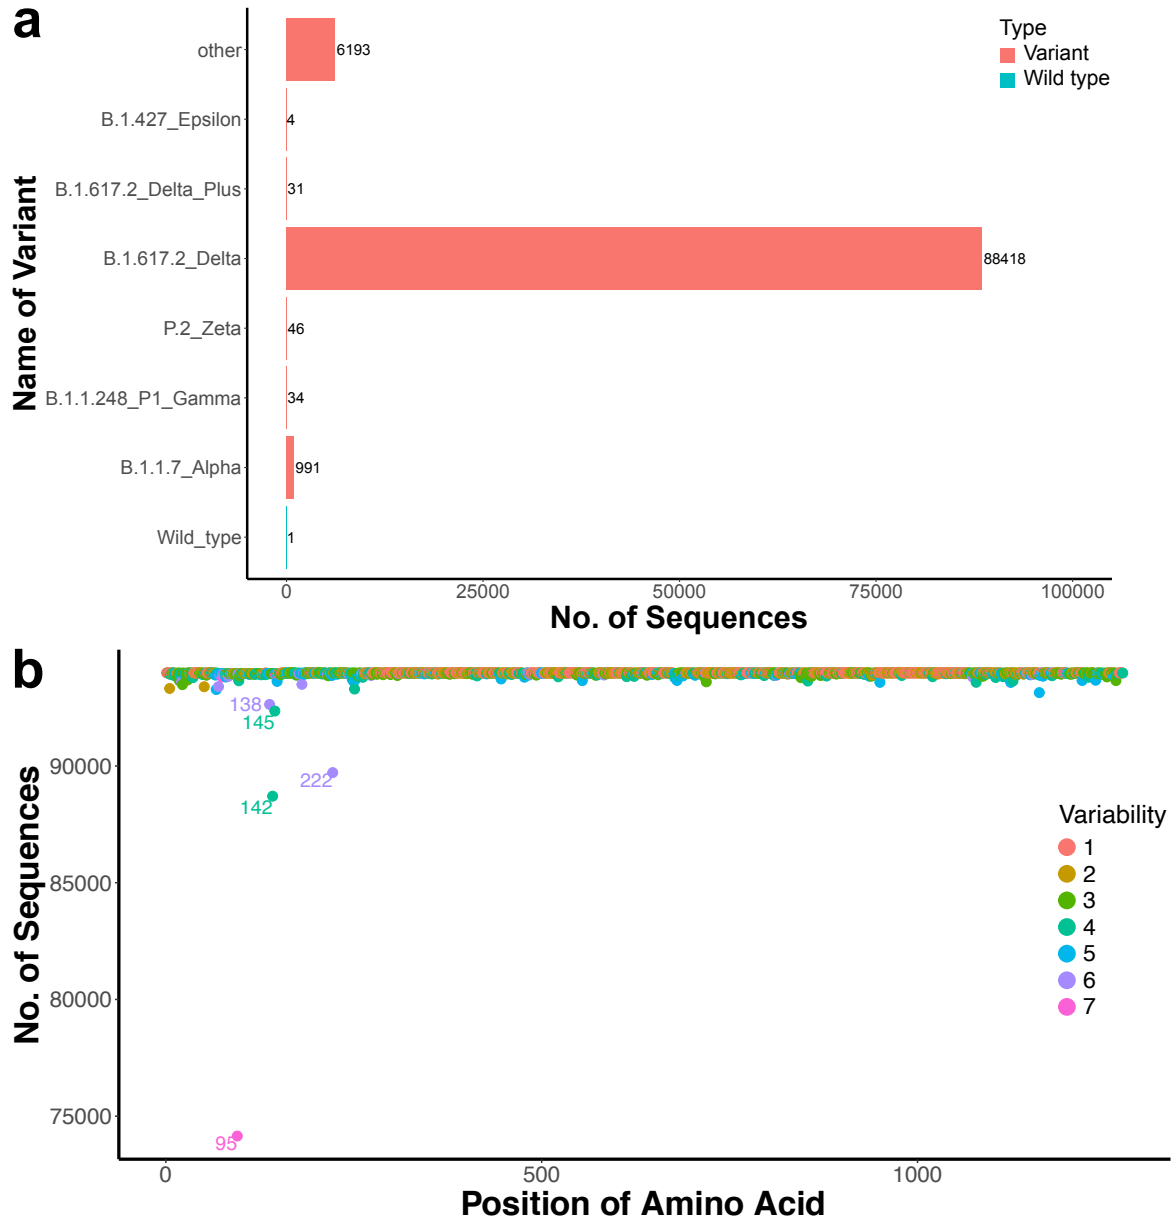

**Fig. 1 | Variant calling and revelation of positions of mutations**

The total number of sequences were  $n = 93992$ , sieved from  $N = 169315$  by removing non-DNA characters from the spike sequences. **a).** Variant-calling using the marker mutations specific to each variant of concern (VOC) in table 1. Wuhan reference sequence was included as a wild type sequence. The most dominant sequence was the delta variant. By using all the delta markers in Table1, sequences grouped under ‘other’, did not fall into any of the groups of the variants. **b).** Visualization of amino acid positions of the delta variant from sequences called using the deletions at 156 and 157 fixed markers for the delta variant. The variability indicates the number of different amino acid molecules competing for each position. Positions are numbered relative to the Wuhan reference sequence. Each plotted data point represents the total number of sequences sharing the most dominant amino acid in each position. The labeling threshold was placed at <99% of the total number of sequences. Positions 95, 138, 142, 145, and 222 were revealed to be accumulating mutations.

251

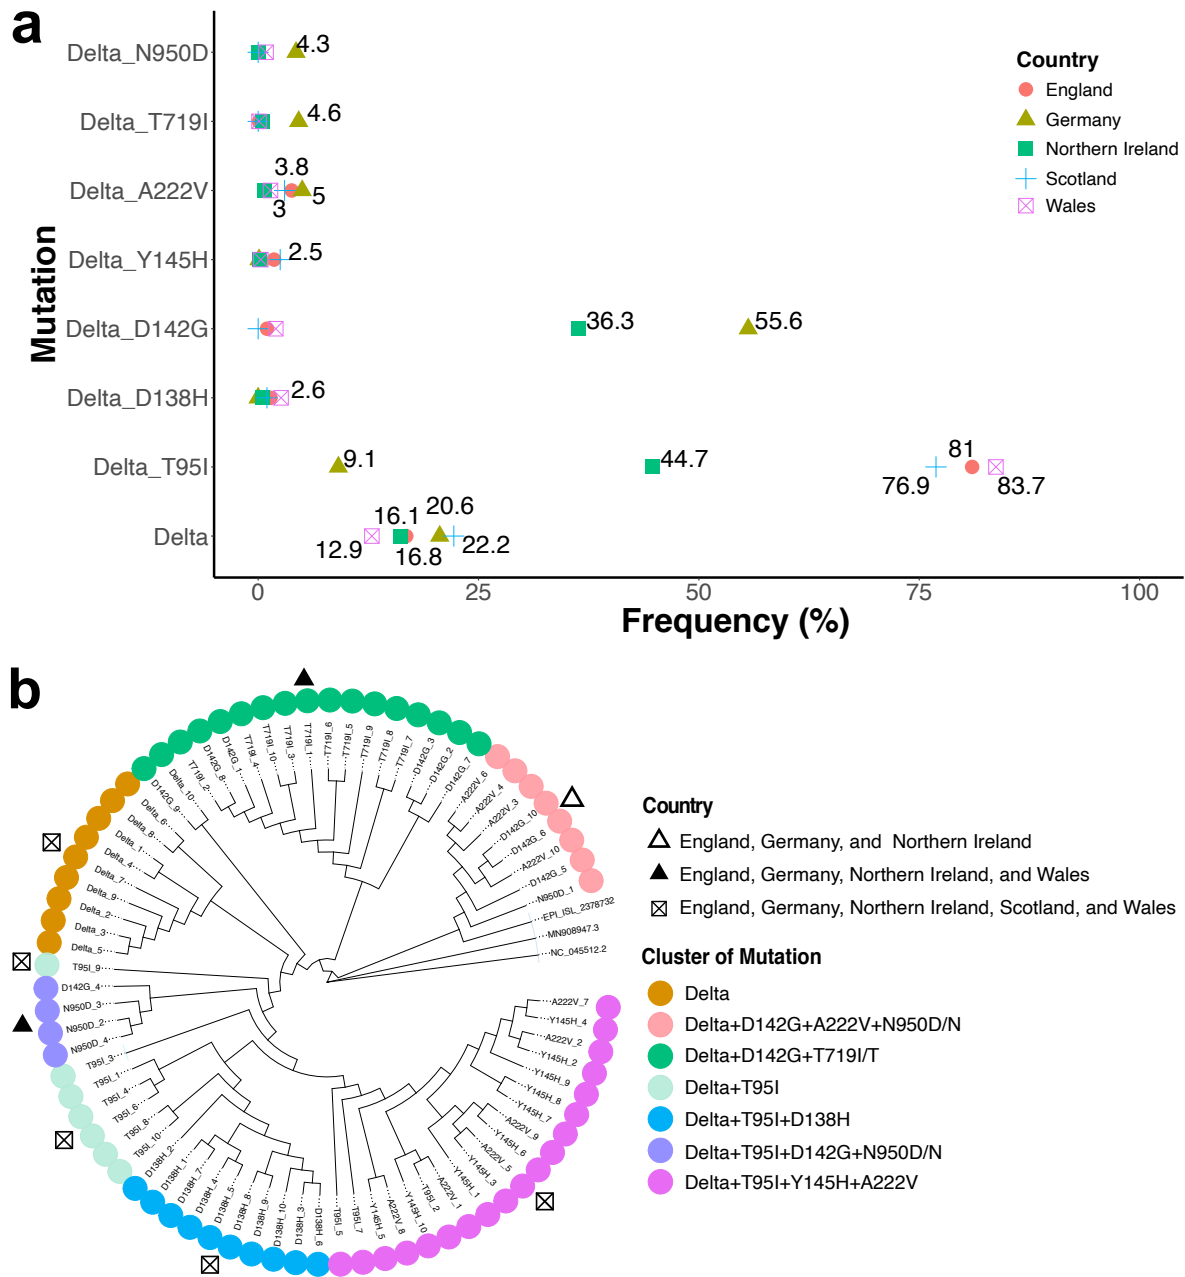

**Fig. 2 | Diversity and clustering of the emerging delta sublineages**

**a**) Mapping geographical distribution of new mutations. Sample sizes for total sequences (N) and delta variant (n) were: England (N = 80443, n = 79674); Germany (N = 7128, n = 6235); Northern Ireland (N = 1115, n = 1085); Scotland (N = 5411, n = 5381); Wales (N = 1587, n = 1569) from GISAID submissions from 2021.07.23 to 2021.08.30. The frequencies were determined relative to the total number of sequences from individual country. **b**) Phylogenetic analysis. The tree shows 74 delta variant sequences representing 10 major haplotypes per group in each of the 7 groups (except N950D/N which had 4 representatives). Phylogeny was inferred using IQTREE maximum likelihood using a GTR+R6 model with 1000 rapid bootstraps (Minh et al., 2020). Two similar Wuhan reference genomes (GenBank ID: MN908947.3 and NC\_045512.2) (F. Wu et al., 2020) and one previously tested delta isolate (GISAID ID: EPI\_ISL\_2378732) (Saito et al., 2021) were included. Seven wide spread clusters of mutations were evident from the tree.

252

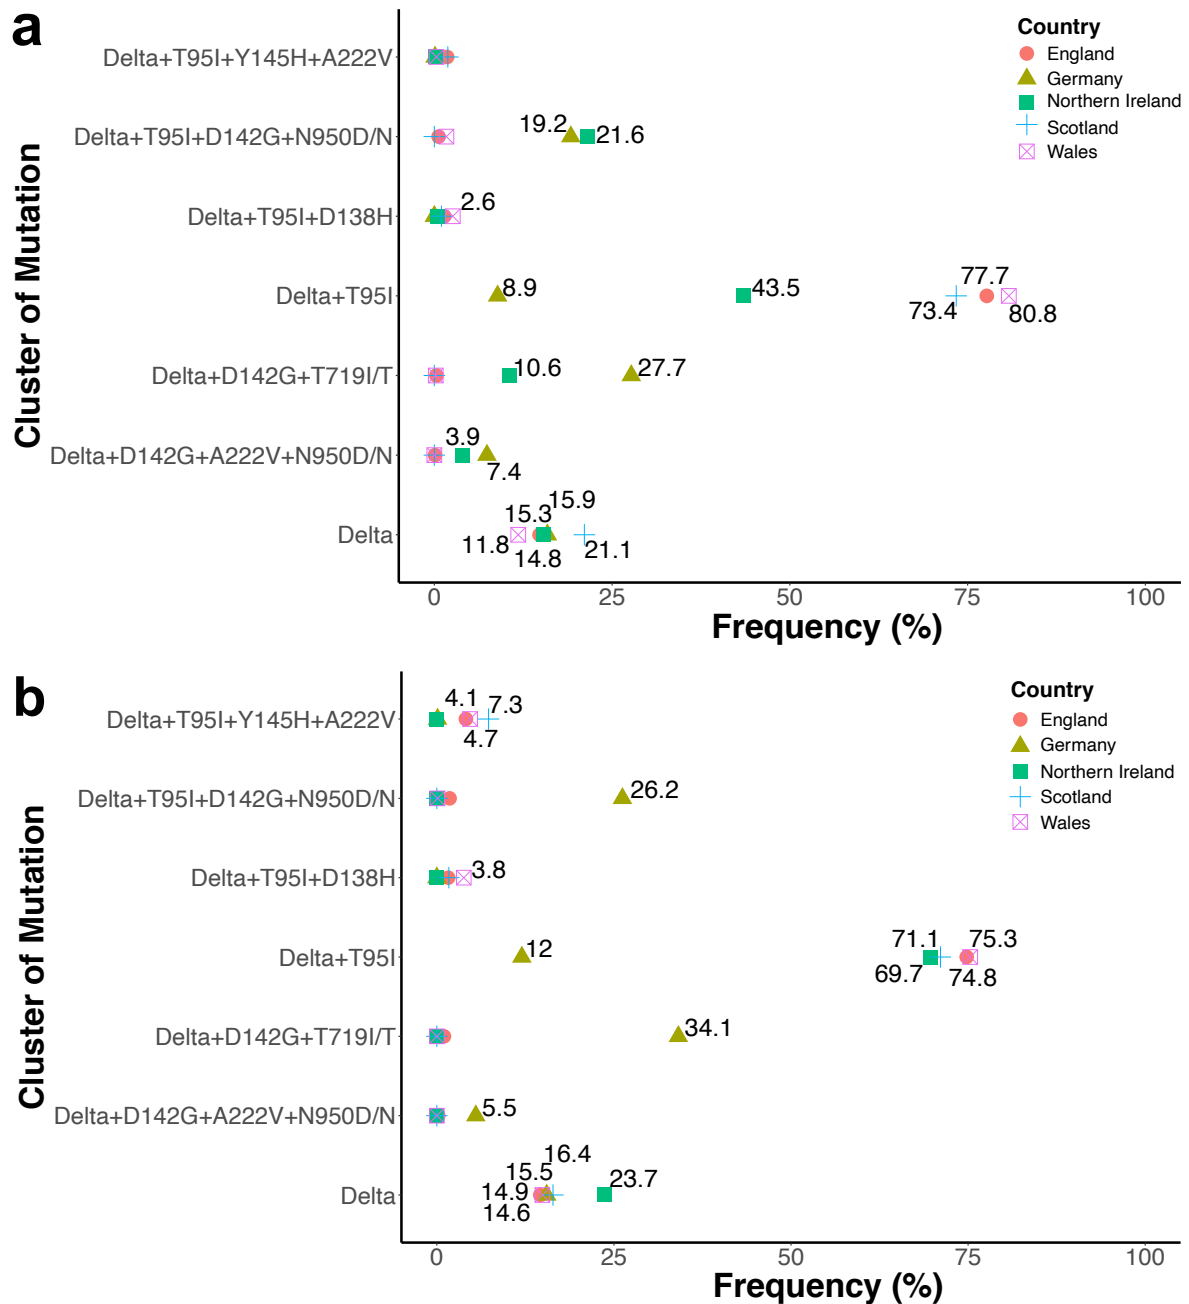

**Fig. 3 | Emergence and spread of delta clusters of mutations**

**a)** Frequencies of cluster of mutations from the sequence batch from 2021.07.23 to 2021.08.30. Sample sizes are as listed in Fig. 2a. **b)** Frequencies of cluster of mutations from the sequence batch from 2021.08.31 to 2021.09.30. Sample sizes for total sequences (N) and delta variant (n) were: England (N = 87668, n = 87195); Germany (N = 17847, n = 17596); Northern Ireland (N = 76, n = 75); Scotland (N = 13757, n = 13716); Wales (N = 5339, n = 5303). Frequencies were calculated relative to the total (N) number of sequences.

253

254

255

**Table 1.** Spike amino acids and positions relative to individual variant that were used as genetic markers for variant calling directly from unaligned SARS-CoV-2 complete genome sequences

| 1     | 2    | 3    | 4    | 5    | 6    | 7    | 8    | 9    | 10   | 11   | 12   | 13    |
|-------|------|------|------|------|------|------|------|------|------|------|------|-------|
| 69S   | 18F  | 417T | 484K | 19R  | 19R  | 19R  | 19R  | 452R | 13I  | 5L   | 69S  | 141Y  |
| 70G   | 80A  | 484K | 614G | 142D | 142D | 142D | 142D | 614G | 152C | 95I  | 70G  | 142H  |
| 78D   | 215G | 501Y |      | 156G | 156G | 156G | 156G |      | 452R | 253G | 95I  | 143K  |
| 80P   | 242H |      |      | 157V | 157V | 157V | 157V |      | 614G | 477N | 253G | 481K  |
| 145N  | 243I |      |      | 450R | 415K | 415N | 450R |      |      | 484K | 477N | 498Y  |
| 501G  | 244S |      |      | 476T | 450R | 450R | 476T |      |      | 614G | 484K | 611G  |
| 611G  | 246L |      |      | 482Q | 476K | 476K | 482Q |      |      | 701V | 614G | 678H  |
| 570T  | 414N |      |      | 612G | 482E | 482E | 612G |      |      |      | 701V | 1173F |
| 614C  | 481K |      |      | 679R | 612G | 612G | 679R |      |      |      | 888L | 1089K |
| 678H  | 498Y |      |      |      | 679R | 679R | 948N |      |      |      |      | 1098Y |
| 681A  | 501G |      |      |      | 948N | 948N |      |      |      |      |      |       |
| 713I  | 611G |      |      |      |      |      |      |      |      |      |      |       |
| 716T  | 614C |      |      |      |      |      |      |      |      |      |      |       |
| 979A  | 698V |      |      |      |      |      |      |      |      |      |      |       |
| 982D  | 701S |      |      |      |      |      |      |      |      |      |      |       |
| 1115H |      |      |      |      |      |      |      |      |      |      |      |       |
| 1118F |      |      |      |      |      |      |      |      |      |      |      |       |

**1** = B.1.1.7 (Alpha); **2** = B.1.351 (Beta); **3** = B.1.1.248 (P1, Gamma); **4** = P.2 (Zeta); **5** = B.1.617.1 (Kappa); **6** = B.1.617.2 (Delta); **7** = B.1.617.2 (Delta Plus); **8** = B.1.617.3; **9** = B.1.427 (Epsilon); **10** = B.1.429 (Epsilon); **11** = B.1.526 (Iota); **12** = B.1.525 (Eta); **13** = P.3 (Theta) (WHO, 2021b, 2021c). Sequences, which could not be called into any of the 13 variants were categorized as ‘other’ for further interrogation. The initial cases of the variants were first reported in 1 = United Kingdom, 2 = South Africa, 3 = Brazil, 4 = Brazil, 5 = India, 6 = India, 7 = India, 8 = India, 9 = USA, 10 = USA, 11 = USA, 12 = USA/Denmark, and 13 = Philippines (WHO, 2021b, 2021c).

256

## 257 **References of the main manuscript**

- 258 Abdool Karim, S. S., & de Oliveira, T. (2021). New SARS-CoV-2 Variants — Clinical, Public  
259 Health, and Vaccine Implications. *New England Journal of Medicine*, 384(19), 1866–1868.  
260 <https://doi.org/10.1056/NEJMC2100362>
- 261 Baral, P., Bhattarai, N., Hossen, M. L., Stebliankin, V., Gerstman, B. S., Narasimhan, G., &  
262 Chapagain, P. P. (2021). Mutation-induced changes in the receptor-binding interface of the  
263 SARS-CoV-2 Delta variant B.1.617.2 and implications for immune evasion. *Biochemical and*  
264 *Biophysical Research Communications*, 574, 14–19.  
265 <https://doi.org/10.1016/J.BBRC.2021.08.036>
- 266 Becerra-Flores, M., & Cardozo, T. (2020). SARS-CoV-2 viral spike G614 mutation exhibits  
267 higher case fatality rate. *International Journal of Clinical Practice*, 74(8).  
268 <https://doi.org/10.1111/IJCP.13525>
- 269 CDC. (2021a). *Emerging SARS-CoV-2 variants*. [https://www.cdc.gov/coronavirus/2019-  
270 ncov/science/science-briefs/scientific-brief-emerging-  
271 variants.html?CDC\\_AA\\_refVal=https%3A%2F%2Fwww.cdc.gov%2Fcoronavirus%2F2019-  
272 ncov%2Fmore%2Fscience-and-research%2Fscientific-brief-emerging-variants.html](https://www.cdc.gov/coronavirus/2019-ncov/science/science-briefs/scientific-brief-emerging-variants.html?CDC_AA_refVal=https%3A%2F%2Fwww.cdc.gov%2Fcoronavirus%2F2019-ncov%2Fmore%2Fscience-and-research%2Fscientific-brief-emerging-variants.html)
- 273 CDC. (2021b). *SARS-CoV-2 Variant Classifications and Definitions*.  
274 [https://www.cdc.gov/coronavirus/2019-ncov/variants/variant-  
275 info.html?ACSTrackingID=USCDC\\_2157-DM66375&ACSTrackingLabel=CDC Updates  
276 SARS-CoV-2 Variant Classifications&deliveryName=USCDC\\_2157-  
277 DM66375#anchor\\_1632150752495](https://www.cdc.gov/coronavirus/2019-ncov/variants/variant-info.html?ACSTrackingID=USCDC_2157-DM66375&ACSTrackingLabel=CDC Updates SARS-CoV-2 Variant Classifications&deliveryName=USCDC_2157-DM66375#anchor_1632150752495)
- 278 CDC. (2021c). *Why Strain Surveillance is Important for Public Health*.  
279 [https://www.cdc.gov/coronavirus/2019-ncov/science/science-briefs/scientific-brief-emerging-  
280 variants.html?CDC\\_AA\\_refVal=https%3A%2F%2Fwww.cdc.gov%2Fcoronavirus%2F2019-  
281 ncov%2Fmore%2Fscience-and-research%2Fscientific-brief-emerging-variants.html](https://www.cdc.gov/coronavirus/2019-ncov/science/science-briefs/scientific-brief-emerging-variants.html?CDC_AA_refVal=https%3A%2F%2Fwww.cdc.gov%2Fcoronavirus%2F2019-ncov%2Fmore%2Fscience-and-research%2Fscientific-brief-emerging-variants.html)
- 282 Chi, X., Yan, R., Zhang, J., Zhang, G., Zhang, Y., Hao, M., Zhang, Z., Fan, P., Dong, Y., Yang,  
283 Y., Chen, Z., Guo, Y., Zhang, J., Li, Y., Song, X., Chen, Y., Xia, L., Fu, L., Hou, L., ...  
284 Chen, W. (2020). A neutralizing human antibody binds to the N-terminal domain of the  
285 Spike protein of SARS-CoV-2. *Science (New York, N.Y.)*, 369(6504), 650–655.  
286 <https://doi.org/10.1126/science.abc6952>
- 287 CoVariants. (2021). *Variant: 21A (Delta)*. <https://covariants.org/variants/21A.Delta>
- 288 Cucinotta, D., & Vanelli, M. (2020). WHO Declares COVID-19 a Pandemic. *Acta Bio-Medica :*  
289 *Atenei Parmensis*, 91(1), 157–160. <https://doi.org/10.23750/abm.v91i1.9397>
- 290 ECDC. (2021). *Sequencing of SARS-CoV-2 - first update*.

- 291 <https://www.ecdc.europa.eu/en/publications-data/sequencing-sars-cov-2>
- 292 Elbe, S., & Buckland-Merrett, G. (2017). Data, disease and diplomacy: GISAID's innovative  
293 contribution to global health. *Global Challenges*, 1(1), 33–46.  
294 <https://doi.org/10.1002/GCH2.1018>
- 295 Fisman, D. N., & Tuite, A. R. (2021). Progressive Increase in Virulence of Novel SARS-CoV-2  
296 Variants in Ontario, Canada. *MedRxiv*, 2021.07.05.21260050.  
297 <https://doi.org/10.1101/2021.07.05.21260050>
- 298 GISAID. (2021a). *Delta variant*. <https://www.gisaid.org/hcov19-variants/>
- 299 GISAID. (2021b). *GISAID*. <https://www.gisaid.org/>
- 300 Gobeil, S. M. C., Janowska, K., McDowell, S., Mansouri, K., Parks, R., Manne, K., Stalls, V.,  
301 Kopp, M. F., Henderson, R., Edwards, R. J., Haynes, B. F., & Acharya, P. (2021). D614G  
302 Mutation Alters SARS-CoV-2 Spike Conformation and Enhances Protease Cleavage at the  
303 S1/S2 Junction. *Cell Reports*, 34(2).
- 304 Gorbalenya, A., Baker, S., Baric, R., de Groot, R., Drosten, C., Gulyaeva, A., Haagmans, B.,  
305 Lauber, C., Leontovich, A., Neuman, B., Penzar, D., Perlman, S., Poon, L., Samborskiy, D.,  
306 Sidorov, I., Sola, I., & Ziebuhr, J. (2020). The species Severe acute respiratory syndrome-  
307 related coronavirus: classifying 2019-nCoV and naming it SARS-CoV-2. *Nature*  
308 *Microbiology*, 5. <https://doi.org/10.1038/s41564-020-0695-z>
- 309 Hou, Y. J., Chiba, S., Halfmann, P., Ehre, C., Kuroda, M., Dinnon, K. H., Leist, S. R., Schäfer, A.,  
310 Nakajima, N., Takahashi, K., Lee, R. E., Mascenik, T. M., Graham, R., Edwards, C. E., Tse,  
311 L. V., Okuda, K., Markmann, A. J., Bartelt, L., Silva, A. De, ... Baric, R. S. (2020). SARS-  
312 CoV-2 D614G variant exhibits efficient replication ex vivo and transmission in vivo. *Science*,  
313 370(6523), 1464–1468. <https://doi.org/10.1126/SCIENCE.ABE8499>
- 314 Jamil, S., Shafazand, S., Pasnick, S., Carlos, W. G., Maves, R., & Dela Cruz, C. (2021). Genetic  
315 variants of SARS-CoV-2: What do we know so far? *American Journal of Respiratory and*  
316 *Critical Care Medicine*, 203. <https://doi.org/10.1164/rccm.2021C5>
- 317 Korber, B., Fischer, W. M., Gnanakaran, S., Yoon, H., Theiler, J., Abfalterer, W., Hengartner, N.,  
318 Giorgi, E. E., Bhattacharya, T., Foley, B., Hastie, K. M., Parker, M. D., Partridge, D. G.,  
319 Evans, C. M., Freeman, T. M., de Silva, T. I., Angyal, A., Brown, R. L., Carrilero, L., ...  
320 Montefiori, D. C. (2020). Tracking Changes in SARS-CoV-2 Spike: Evidence that D614G  
321 Increases Infectivity of the COVID-19 Virus. *Cell*, 182(4), 812-827.e19.  
322 <https://doi.org/10.1016/j.cell.2020.06.043>
- 323 Laiton-Donato, K., Franco-Muñoz, C., Álvarez-Díaz, D. A., Ruiz-Moreno, H. A., Usme-Ciro, J.  
324 A., Prada, D. A., Reales-González, J., Corchuelo, S., Herrera-Sepúlveda, M. T., Naizaque, J.,

- 325 Santamaría, G., Rivera, J., Rojas, P., Ortiz, J. H., Cardona, A., Malo, D., Prieto-Alvarado, F.,  
326 Gómez, F. R., Wiesner, M., ... Mercado-Reyes, M. (2021). Characterization of the emerging  
327 B.1.621 variant of interest of SARS-CoV-2. *Infection, Genetics and Evolution*, 95, 105038.  
328 <https://doi.org/10.1016/J.MEEGID.2021.105038>
- 329 Lan, J., Ge, J., Yu, J., Shan, S., Zhou, H., Fan, S., Zhang, Q., Shi, X., Wang, Q., Zhang, L., &  
330 Wang, X. (2020). Structure of the SARS-CoV-2 spike receptor-binding domain bound to the  
331 ACE2 receptor. *Nature*, 581(7807), 215–220. <https://doi.org/10.1038/S41586-020-2180-5>
- 332 Lauring, A., & Hodcroft, E. (2021). Genetic Variants of SARS-CoV-2—What Do They Mean?  
333 *JAMA*, 325. <https://doi.org/10.1001/jama.2020.27124>
- 334 Li, Q., Wu, J., Nie, J., Zhang, L., Hao, H., Liu, S., Zhao, C., Zhang, Q., Liu, H., Nie, L., Qin, H.,  
335 Wang, M., Lu, Q., Li, X., Sun, Q., Liu, J., Zhang, L., Li, X., Huang, W., & Wang, Y. (2020).  
336 The Impact of Mutations in SARS-CoV-2 Spike on Viral Infectivity and Antigenicity. *Cell*,  
337 182(5), 1284-1294.e9. <https://doi.org/10.1016/j.cell.2020.07.012>
- 338 Liu, L., Wang, P., Nair, M. S., Yu, J., Rapp, M., Wang, Q., Luo, Y., Chan, J. F.-W., Sahi, V.,  
339 Figueroa, A., Guo, X. V, Cerutti, G., Bimela, J., Gorman, J., Zhou, T., Chen, Z., Yuen, K.-Y.,  
340 Kwong, P. D., Sodroski, J. G., ... Ho, D. D. (2020). Potent neutralizing antibodies against  
341 multiple epitopes on SARS-CoV-2 spike. *Nature*, 584(7821), 450–456.  
342 <https://doi.org/10.1038/s41586-020-2571-7>
- 343 Minh, B. Q., Schmidt, H. A., Chernomor, O., Schrempf, D., Woodhams, M. D., von Haeseler, A.,  
344 & Lanfear, R. (2020). IQ-TREE 2: New Models and Efficient Methods for Phylogenetic  
345 Inference in the Genomic Era. *Molecular Biology and Evolution*, 37(5), 1530–1534.  
346 <https://doi.org/10.1093/molbev/msaa015>
- 347 Motozono, C., Toyoda, M., Zahradnik, J., Saito, A., Nasser, H., Tan, T. S., Ngare, I., Kimura, I.,  
348 Uriu, K., Kosugi, Y., Yue, Y., Shimizu, R., Ito, J., Torii, S., Yonekawa, A., Shimono, N.,  
349 Nagasaki, Y., Minami, R., Toya, T., ... Sato, K. (2021). SARS-CoV-2 spike L452R variant  
350 evades cellular immunity and increases infectivity. *Cell Host & Microbe*, 29(7), 1124-  
351 1136.e11. <https://doi.org/10.1016/J.CHOM.2021.06.006>
- 352 NCBI. (2021). *NCBI*. <https://www.ncbi.nlm.nih.gov/>
- 353 Peacock, T. P., Sheppard, C. M., Brown, J. C., Goonawardane, N., Zhou, J., Whiteley, M.,  
354 Consortium, P. V., Silva, T. I. de, & Barclay, W. S. (2021). The SARS-CoV-2 variants  
355 associated with infections in India, B.1.617, show enhanced spike cleavage by furin. *BioRxiv*,  
356 44(0), 2021.05.28.446163.  
357 [https://www.biorxiv.org/content/10.1101/2021.05.28.446163v1%0Ahttps://www.biorxiv.org/  
358 content/10.1101/2021.05.28.446163v1.abstract](https://www.biorxiv.org/content/10.1101/2021.05.28.446163v1%0Ahttps://www.biorxiv.org/content/10.1101/2021.05.28.446163v1.abstract)

- 359 Plante, J. A., Liu, Y., Liu, J., Xia, H., Johnson, B. A., Lokugamage, K. G., Zhang, X., Muruato, A.  
360 E., Zou, J., Fontes-Garfias, C. R., Mirchandani, D., Scharton, D., Bilello, J. P., Ku, Z., An,  
361 Z., Kalveram, B., Freiberg, A. N., Menachery, V. D., Xie, X., ... Shi, P. Y. (2021). Spike  
362 mutation D614G alters SARS-CoV-2 fitness. *Nature*, *592*(7852), 116–121.  
363 <https://doi.org/10.1038/S41586-020-2895-3>
- 364 RKI. (2021). *Bericht zu Virusvarianten von SARS-CoV-2 in Deutschland, insbesondere zur*  
365 *Variant of Concern (VOC) B.1.1.7.*  
366 [rki.de/DE/Content/InfAZ/N/Neuartiges\\_Coronavirus/DESH/Bericht\\_VOC\\_2021-03-](https://www.rki.de/DE/Content/InfAZ/N/Neuartiges_Coronavirus/DESH/Bericht_VOC_2021-03-17.pdf?__blob=publicationFile)  
367 [17.pdf?\\_\\_blob=publicationFile](https://www.rki.de/DE/Content/InfAZ/N/Neuartiges_Coronavirus/DESH/Bericht_VOC_2021-03-17.pdf?__blob=publicationFile)
- 368 Saito, A., Nasser, H., Uriu, K., Kosugi, Y., Irie, T., Shirakawa, K., Sadamasu, K., Kimura, I., Ito,  
369 J., Wu, J., Ozono, S., Tokunaga, K., Butlertanaka, E. P., Tanaka, Y. L., Shimizu, R., Shimizu,  
370 K., Fukuhara, T., Kawabata, R., Sakaguchi, T., ... Sato, K. (2021). SARS-CoV-2 spike  
371 P681R mutation enhances and accelerates viral fusion. *BioRxiv*, 2021.06.17.448820.  
372 <https://doi.org/10.1101/2021.06.17.448820>
- 373 Sheikh, A., McMenamin, J., Taylor, B., & Robertson, C. (2021). SARS-CoV-2 Delta VOC in  
374 Scotland: demographics, risk of hospital admission, and vaccine effectiveness. In *Lancet*  
375 *(London, England)* (Vol. 397, Issue 10293, pp. 2461–2462). [https://doi.org/10.1016/S0140-](https://doi.org/10.1016/S0140-6736(21)01358-1)  
376 [6736\(21\)01358-1](https://doi.org/10.1016/S0140-6736(21)01358-1)
- 377 Starr, T. N., Greaney, A. J., Dingens, A. S., & Bloom, J. D. (2021). Complete map of SARS-CoV-  
378 2 RBD mutations that escape the monoclonal antibody LY-CoV555 and its cocktail with LY-  
379 CoV016. *Cell Reports Medicine*, *2*(4), 100255.  
380 <https://doi.org/10.1016/J.XCRM.2021.100255>
- 381 Tegally, H., Wilkinson, E., Giovanetti, M., Iranzadeh, A., Fonseca, V., Giandhari, J., Doolabh, D.,  
382 Pillay, S., San, E. J., Msomi, N., Mlisana, K., von Gottberg, A., Walaza, S., Allam, M.,  
383 Ismail, A., Mohale, T., Glass, A. J., Engelbrecht, S., Van Zyl, G., ... de Oliveira, T. (2021).  
384 Detection of a SARS-CoV-2 variant of concern in South Africa. *Nature*, *592*(7854), 438–  
385 443. <https://doi.org/10.1038/S41586-021-03402-9>
- 386 Tegally, H., Wilkinson, E., Lessells, R. J., Giandhari, J., Pillay, S., Msomi, N., Mlisana, K.,  
387 Bhiman, J. N., von Gottberg, A., Walaza, S., Fonseca, V., Allam, M., Ismail, A., Glass, A. J.,  
388 Engelbrecht, S., Van Zyl, G., Preiser, W., Williamson, C., Petruccione, F., ... de Oliveira, T.  
389 (2021). Sixteen novel lineages of SARS-CoV-2 in South Africa. *Nature Medicine*, *27*(3),  
390 440–446. <https://doi.org/10.1038/s41591-021-01255-3>
- 391 Wang, R., Hozumi, Y., Yin, C., & Wei, G. W. (2020). Mutations on COVID-19 diagnostic targets.  
392 *Genomics*, *112*(6), 5204–5213. <https://doi.org/10.1016/J.YGENO.2020.09.028>



- 393 WHO. (2021a). *The effects of virus variants on COVID-19 vaccines*. [https://www.who.int/news-](https://www.who.int/news-room/feature-stories/detail/the-effects-of-virus-variants-on-covid-19-vaccines?gclid=CjwKCAjw-sqKBhBjEiwAVaQ9azeXfBJUkJAMRUAYSG-Z9mQziqRWzpkDVBD8-wFLoykiLqqng0YBCBoCKN0QAvD_BwE)  
394 [room/feature-stories/detail/the-effects-of-virus-variants-on-covid-19-](https://www.who.int/news-room/feature-stories/detail/the-effects-of-virus-variants-on-covid-19-vaccines?gclid=CjwKCAjw-sqKBhBjEiwAVaQ9azeXfBJUkJAMRUAYSG-Z9mQziqRWzpkDVBD8-wFLoykiLqqng0YBCBoCKN0QAvD_BwE)  
395 [vaccines?gclid=CjwKCAjw-sqKBhBjEiwAVaQ9azeXfBJUkJAMRUAYSG-](https://www.who.int/news-room/feature-stories/detail/the-effects-of-virus-variants-on-covid-19-vaccines?gclid=CjwKCAjw-sqKBhBjEiwAVaQ9azeXfBJUkJAMRUAYSG-Z9mQziqRWzpkDVBD8-wFLoykiLqqng0YBCBoCKN0QAvD_BwE)  
396 [Z9mQziqRWzpkDVBD8-wFLoykiLqqng0YBCBoCKN0QAvD\\_BwE](https://www.who.int/news-room/feature-stories/detail/the-effects-of-virus-variants-on-covid-19-vaccines?gclid=CjwKCAjw-sqKBhBjEiwAVaQ9azeXfBJUkJAMRUAYSG-Z9mQziqRWzpkDVBD8-wFLoykiLqqng0YBCBoCKN0QAvD_BwE)
- 397 WHO. (2021b). *Tracking SARS-CoV-2 variants*. [https://www.who.int/en/activities/tracking-](https://www.who.int/en/activities/tracking-SARS-CoV-2-variants/)  
398 [SARS-CoV-2-variants/](https://www.who.int/en/activities/tracking-SARS-CoV-2-variants/)
- 399 WHO. (2021c). *WHO announces simple, easy-to-say labels for SARS-CoV-2 Variants of Interest*  
400 *and Concern*.
- 401 Wu, F., Zhao, S., Yu, B., Chen, Y. M., Wang, W., Song, Z. G., Hu, Y., Tao, Z. W., Tian, J. H.,  
402 Pei, Y. Y., Yuan, M. L., Zhang, Y. L., Dai, F. H., Liu, Y., Wang, Q. M., Zheng, J. J., Xu, L.,  
403 Holmes, E. C., & Zhang, Y. Z. (2020). A new coronavirus associated with human respiratory  
404 disease in China. *Nature*, 579(7798), 265–269. <https://doi.org/10.1038/S41586-020-2008-3>
- 405 Wu, K., Werner, A. P., Moliva, J. I., Koch, M., Choi, A., Stewart-Jones, G. B. E., Bennett, H.,  
406 Boyoglu-Barnum, S., Shi, W., Graham, B. S., Carfi, A., Corbett, K. S., Seder, R. A., &  
407 Edwards, D. K. (2021). mRNA-1273 vaccine induces neutralizing antibodies against spike  
408 mutants from global SARS-CoV-2 variants. *BioRxiv*, 2021.01.25.427948.  
409 <https://doi.org/10.1101/2021.01.25.427948>
- 410 Zaveri, L., Singh, R., Basu, P., Banu, S., Mukherjee, P., Vishwakarma, S., Sahni, C., Kaur, M.,  
411 Singh, N. K., Yadav, A. K., Yadav, A. K., Ashish, Mishra, S., Tiwari, S., Mishra, S. P.,  
412 Vodapalli, A., Bollu, H., Das, D., Singh, P. P., ... Tallapaka, K. B. (2021). Genomic analysis  
413 of SARS-CoV-2 breakthrough infections from Varanasi, India. *MedRxiv*,  
414 2021.09.19.21262487. <https://doi.org/10.1101/2021.09.19.21262487>
- 415 Zhu, N., Zhang, D., Wang, W., Li, X., Yang, B., Song, J., Zhao, X., Huang, B., Shi, W., Lu, R.,  
416 Niu, P., Zhan, F., Ma, X., Wang, D., Xu, W., Wu, G., Gao, G. F., & Tan, W. (2020). A Novel  
417 Coronavirus from Patients with Pneumonia in China, 2019. *New England Journal of*  
418 *Medicine*, 382(8), 727–733. <https://doi.org/10.1056/NEJMoa2001017>  
419

## 1 **Additional Information**

## 2 **Methods and supplementary figures and tables**

## 3 **Methods**

### 4 *1. Sample size and origin of SARS-CoV-2 genome sequences*

5 A total of 169315 complete SARS-CoV-2 genome sequences from Germany and United Kingdom  
6 that were submitted to the GISAID platform from 2021.07.23 to 2021.08.30, and a subsequent,  
7 214766 latest genome sequences, which were submitted from 2021.08.31 to 2021.09.30 were  
8 downloaded for analysis in this study from the GISAID platform (/) on 2021.08.30 and 2021.09.30  
9 respectively (<https://www.gisaid.org>). These nations and their respective research communities are  
10 among the geographical regions, which have invested in genomic surveillance as part of their  
11 routine monitoring of the SARS-CoV-2, hence their genomic data are reliable in estimating the  
12 actual Covid-19 circulation in their respective territories (GOV.UK, 2021; RKI, 2021). The  
13 downloaded sequences were read to v4.1.1 R software (Team, 2021) using the readDNAStrngSet  
14 function of v2.60.2 Biostrings R package (H. Pagès, P. Aboyoun, 2021). DECIPHER R package  
15 v2.20.0 (Erik, 2016) was used to Browse and align the sequences.

### 16 *2. Streamlining the retrieval of SARS-CoV-2 gene sequences*

17 To streamline a faster and easier method to retrieve gene sequences without doing computationally  
18 intensive process of SARS-CoV-2 sequence alignments of large sequence datasets with respect to  
19 the Wuhan NC\_045512 reference genome, patterns of short (between 8 and 40 bases) sequences  
20 flanking all the genes, similar length ranges for patterns at the start of the genes, and similar length  
21 ranges for patterns at the end of the genes were identified from the Wuhan reference genome (Wu  
22 et al., 2020). The patterns specific and/or not specific to spike gene were used to trim off the spike  
23 gene regions out of the DNA string sets of the genome sequences using the sub function of R  
24 Documentation. For example:

25 To trim off the flanking region and keep gene sequences but excluding the two patterns, which are  
26 not part of the spike gene, a code like this was used;

```
27 S <- DNAStrngSet(sub(".*ACAACTAAACGAACA(.*?)TAAACGAACTTAT.*", "\\1", S))
```

28 To trim off the flanking regions and keep gene sequences including the two patterns because they  
29 are part of the spike gene, a code similar to this was used:

```
30 S <- DNAStrngSet(sub(".*(ATGTTTGTCTTCTTGT.*?TCAAATTACATTACACA).*", "\\1", S))
```

31

32 To trim off the flanking regions and keep gene sequences including the first pattern, which is part  
33 of the gene, while at the same time discarding the second pattern, which is not part of the coding  
34 gene sequences, a code like this was used;

```
35 S <- DNASTringSet(sub(".*(ATGTTTGT.*)TAAACGAACT.*","\|", S))
```

36 Note that a number of different patterns were selected to capture all the sequences, especially gene  
37 sequences with unambiguous nucleotide mutations in regions that match the selected pattern. To  
38 clarify this, a few selected sequences, in which the used patterns did not capture the gene due to  
39 mutations, were filtered and selected for alignment with the complete genome of Wuhan reference  
40 sequence. To inspect and identify additional patterns required to capture all the sequences, the  
41 results of sequence alignment were browsed in the browser.

```
S <- S[width(S) >3819,]  
S <- DNASTringSet(c(ref,S))  
Salign <- AlignSeqs(S)  
BrowseSeq(Salign, highlight = 1)
```

42  
43 The genomic range of the spike gene of the Wuhan reference genome were used to locate and  
44 analyze the spike genes from the sequences as follows:

```
refS <- DNASTringSet(substr(ref, start=21563, stop=25384))  
Salign2 <- DNASTringSet(substr(Salign, start=21563, stop=25384))
```

45  
46 Adjustment on this range was made to include immediate flanking regions of the alignment so that  
47 presence of mutations in the flanking regions that render the trimming of the spike gene a failure  
48 was inspected. Using blindly downloaded SARS-CoV-2 complete genome sequences from the  
49 GISAID platform and the NCBI GenBank (GISAID, 2021; NCBI, 2021), all possible patterns  
50 were validated for trimming genome sequences and retrieving the spike gene sequences without  
51 having to do multiple sequence alignments. To this end, the spike gene sequences were  
52 successfully retrieved from thousand complete genomic sequences. Width function was used to  
53 assess the efficiency of trimming and to check variations in lengths of the retrieved spike gene  
54 sequence

```
all_S1 <- all_S[!width(all_S) >3813,]  
all_S2 <- all_S[!width(all_S) ==3813,]  
all_S3 <- all_S[width(all_S) ==3813,]  
all_S4 <- all_S[!width(all_S) <3813,]
```

55  
56

### 57 3. Easing the approach of variant calling

58 Next, a method for variant calling was also simplified. To do this, the workflow for variant calling  
59 was done by numbering positions of the spike mutation markers that define individual variants  
60 relative to self, instead of the reference spike sequence (Table 1). The retrieved spike sequences  
61 were processed by cleaning to remove non-nucleotide characters using clean function of v1.50.0  
62 ShortRead R package (Morgan et al., 2009).  
63 Cleaned sequences were translated to protein amino acid sequences using translate function of  
64 Biostrings R package (H. Pagès, P. Aboyoun, 2021). The strings of amino acid sequences were  
65 processed for calling the variants in data frame format, where all the strings of sequences should  
66 subsequently be split into individual amino acid letters. Before converting them to data frame, all  
67 the sequences were made to have the same lengths. Edges from the ends of all the sequences  
68 regions were slightly trimmed to retain 1 to 1195, effectively forcing them to have same lengths.  
69 This range was chosen because all the positions for calling the variants were within this range  
70 (Table 1). This was done using substr function of R Documentation.

```
71 Sa <- AAStringSet(substr(Sa, start=1, stop=1195)).
```

72 The trimmed sequences were subsequently transformed to data frame dataset. To get individual  
73 amino acid characters in their respective positions, stringsets of amino acid were split using  
74 stri\_extract\_all\_regex function of v1.7.4 stringi R package (Gagolewski, 2021).

75 For amino acid, at protein level:

```
76 dfSa <- data.frame(stri_extract_all_regex(dfSa$Sa, '{1,1}'))
```

77 For codon, at nucleotide level:

```
78 dfSc <- data.frame(stri_extract_all_regex(dfSc$Sc, '{1,3}'))
```

79 To call the variants by exploiting the positions of the amino acid from the split amino acid  
80 stringsets, key genetic markers specific to each variant (Table 1), were used. For example, below  
81 is the code, which was used to call the parental delta variant;

```
82 dfSa$B.1.617.2_Delta <- ifelse(dfSa$X19=="R" & dfSa$X142=="D" &  
dfSa$X156=="G" & dfSa$X157=="V" & dfSa$X415=="K" & dfSa$X450=="R" &  
dfSa$X476=="K" & dfSa$X482=="E" & dfSa$X612=="G" & dfSa$X679=="R" &  
dfSa$X948=="N" ,"yes", "no")
```

83 This was repeated for each individual variant named in Table 1. Sequences which could not be  
84 classified into any of the variants were categorized as 'other' for further interrogation.

85 Data were processed further using v1.4.4 reshape2 (Wickham, 2007), v1.14.0 data.table  
86 (Srinivasan, 2021), v1.3.1 tidyverse (Wickham et al., 2019), v1.1.3 tidyr (Wickham, 2021), v0.6.5  
87 xlsx(Arendt, 2020), and v1.4.0 writexl R packages. Plots were visualized using v3.3.5 ggplot2 R

88 package (H, 2016) and v0.4.13 circlize R package (Gu et al., 2014). Plots were further refined in  
89 v1.1.1 Inkscape (Project, 2021).

#### 90 4. *Frequency of codons or amino acids per position*

91 To summarize frequency matrix of codons or amino acids per position in all the gene sequences,  
92 the excised sequences from the complete genomes were analyzed both at the codon and the amino  
93 acid levels. Delta spike protein sequences have protein lengths of 1271 amino acids, which are  
94 characterized by two key fixed deletion mutations of two codons (amino acids) in the positions  
95 between 156 and 158 (See comment\* for explanation below the Table S1). The sequences were  
96 transformed to data frame and split to positions 1 to 1271 of individual amino acids. Note that  
97 these sequences were not aligned relative to the Wuhan reference genome, and as such they were  
98 two-amino acid shorter in lengths than the reference genome. To make them have a full-size of  
99 1273 amino acid long equivalent to the positions in the reference genome, 2 instances of gaps "-"  
100 both at the codon and the amino acid levels were introduced into each sequence at positions 156  
101 and 157 in the data frame of the sequences. This was done as follows:

```
Sa$"156" <- "-"  
Sa$"157" <- "-"  
Sa<- Sa[, c(1:155,1272,1273,156:1271)]  
Sa <- data.frame(t(Sa))  
rownames(Sa) <-1:1273  
Sa <- data.frame(t(Sa))
```

102

103 To enable visualization of positions with mutations, the split positions were transformed by  
104 transposing the rows (sequences) to columns, which in turn made the columns (amino acid  
105 positions) as rows:

```
Sa <- data.frame(t(Sa))
```

106

107 This offered an opportunity to count in a row wise the codons (nucleotide level) and amino acids  
108 (protein level) competing for each individual position across all the sequences. To do this, unite  
109 function of v1.0.7 dplyr R package (Hadley Wickham, Romain François & Henry, 2021) was used  
110 to unite the rows (codons or amino acids) with commas as separators.

111 For instance, considering 180000 as the number of sequences to be analyzed, the unite code would  
112 look like this:

```
Sdelta <- unite(Sdelta, "seq", c("X1":"X180000"), sep = ",")
```

113

114

115 To count the frequencies of individual codons or amino acids across all the sequences present per  
116 position, a code below was used:

```
Freq.Sdelta <- cbind(Sdelta, as.data.frame.matrix(  
+ table(  
+ stack(  
+ setNames(  
+ strsplit(as.character(Sdelta$seq), ','), 1:nrow(Sdelta))  
+ )[2:1])))  
Freq.Sdelta$seq = NULL  
117 Freq.Sdelta <- as.data.frame(Freq.Sdelta)
```

### 118 5. *Visualizing positions of mutations*

119 To count the number of codons or amino acids competing for an individual position, a new  
120 column was introduced to the above Freq.Sdelta data frame as follows:

```
121 Freq.Sdelta$Variability <- rowSums(Freq.Sdelta!=0)
```

122 For a conserved codon or amino acid in a given position, in a total of 180000 sequences, it is  
123 expected that all the 180000 sequences will have same codon or amino acid at this position.  
124 However, if there is a synonymous or non-synonymous mutation at codon level, the maximum  
125 number of sequences, in this case 180000, will be shared by the wild type codon and the new  
126 codon bearing a mutation. At the amino acid level, only non-synonymous mutation will compete  
127 for the position, effectively reducing the total number of 180000 sequences from the wild type  
128 amino acid. As a consequence of this, no position will have the maximum counts amino acids as  
129 180000 of sequences. To show the most predominant codon and/or amino acid in each position,  
130 which in this case will have highest maximum number of sequences in each position, new column  
131 was introduced by running the following code:

```
132 Freq.Sdelta$Max_n <- apply(Freq.Sdelta, 1, max)
```

133 To enable visualization in a graph indicating position of the sequence, a new variable 'Position' in  
134 the last column was introduced as:

```
135 Freq.Sdelta$Position <- 1:1273
```

136 Positions of codons or amino acids, were visualized in a plot showing the number of sequences  
137 'Max\_n' against the position 'Position' in the sequence with 'variability' using ggplot2 R  
138 package. To reveal sites that are undergoing mutations, sites with threshold of <99% of the  
139 sequences were labelled. Note that this graph neither showed nor discriminated between the fixed

140 mutations and the conserved sites in the gene. To interrogate amino acid sites that have fixed  
141 mutations and/or are undergoing fixation in the spike sequences (all\_Sa) relative to the  
142 NC\_045512 reference sequence, the Wuhan wild-type genome was included as the first sequence  
143 in the amino acid sequences dataset. The sequences were browsed using the BrowseSeq function  
144 of DECIPHER R package as mentioned above, while highlighting the reference gene.

```
145 BrowseSeq(all_Sa, highlight = 1)
```

146 In the final dataset, the reference gene sequences for codons and/or amino acids were included for  
147 comparison with the codons and/or amino acids in the sequences. For codon frequency, codons  
148 used in the sequences were translated to show their respective amino acids, so that synonymous  
149 and non-synonymous codons can easily be identified.

150 To observed genetic diversity in the remaining genes: Orf1ab, orf3a, E, M, orf6, orf7a, orf7b, orf8,  
151 N and orf10, similar analyses that were done on the spike gene were extended to all these genes.  
152 Note that for the orf1ab gene, the reading was corrected so that part orf1a of the gene joins with  
153 the second part orf1b to give the correct reading frame for the entire orf1ab gene. Therefore,  
154 reading frame of orf1ab gene in all the orf1ab sequences was corrected by running the following  
155 code:

```
156 all_orf1ab <- DNASTringSet(str_replace(all_orf1ab, "AAACGGGTT", "AAACCGGGTT"))
```

### 157 *6. Grouping of single mutations*

158 Sequences were grouped into groups with different single non-synonymous mutations using the  
159 genetic markers for the delta variant in Table 1 as well as new emerging single amino acid  
160 mutations. By looking at the patterns of these new single mutations at the spike protein sequences,  
161 and to some extent the rest of the genes, further groups consisting of clusters of one or more  
162 combinations of mutations were created, and confirmed by phylogenetic analysis.

### 163 *7. Phylogenetic analysis*

164 To select representative genomes from 93647 sequences (GISAID submissions from 2021.07.23  
165 to 2021.08.30) for use to infer phylogeny, complete genome sequences were trimmed. The  
166 sequences were trimmed to exclude the sequence portions before the first gene (orf1ab) and the  
167 sequence portions after the last gene (orf10) using the previously described pattern matching  
168 method above. Sequences were cleaned to ensure quality of sequence coverage on the entire  
169 genome. Frequency of identical genomes (haplotypes) were counted from the trimmed sequences,  
170 and those sequences which appeared once were discarded to remain with 27993 genomes.

171 Frequencies of haplotypes in each mutation category were counted and arranged from the most

172 dominant to the least dominant haplotypes. From these grouped haplotypes, representative  
173 sequence for each of the first 10 haplotypes per mutation category (except for delta\_ N950D,  
174 which had only 4 representatives), were used to infer phylogeny (Table S2).  
175 Phylogeny was inferred using IQTREE maximum likelihood (Minh et al., 2020)  
176 (<http://iqtree.cibiv.univie.ac.at/>) applying a GTR+R6 model with 1000 rapid bootstraps. Two  
177 similar Wuhan reference genomes ( GenBank ID: MN908947.3 and NC\_045512.2) (Wu et al.,  
178 2020) and previously tested delta isolate (GISAID ID: EPI\_ISL\_2378732) (Saito et al., 2021)  
179 were included in the analysis to assess the extent of genetic divergence. Phylogeny annotations,  
180 including geographic distributions of clusters of mutations were done using v3.1.4.991 ggtree R  
181 package (Yu, 2020).

#### 182 *8. Clustering, mapping and tracking of mutations*

183 Beyond the haplotypes, clusters of mutations were retraced back to the whole dataset to confirm  
184 the divergence of emerging delta sublineages. These clusters of mutations were mapped to their  
185 respective countries, which the sequences originated from. To detect changes in frequencies of  
186 clusters of mutations that had been identified, the most recent set of genomic data (N = 214766)  
187 submitted to the GISAID platform from the same countries in the previous month from  
188 2021.08.31 to 2021.09.30, were downloaded on 2021.09.30 and analysed in a similar way as  
189 described above. Results were compared with those of genome sequences (N = 169315) from the  
190 submissions of the period from 2021.07.23 to 2021.08.30.

191



192 **Supplementary figures and tables**

193

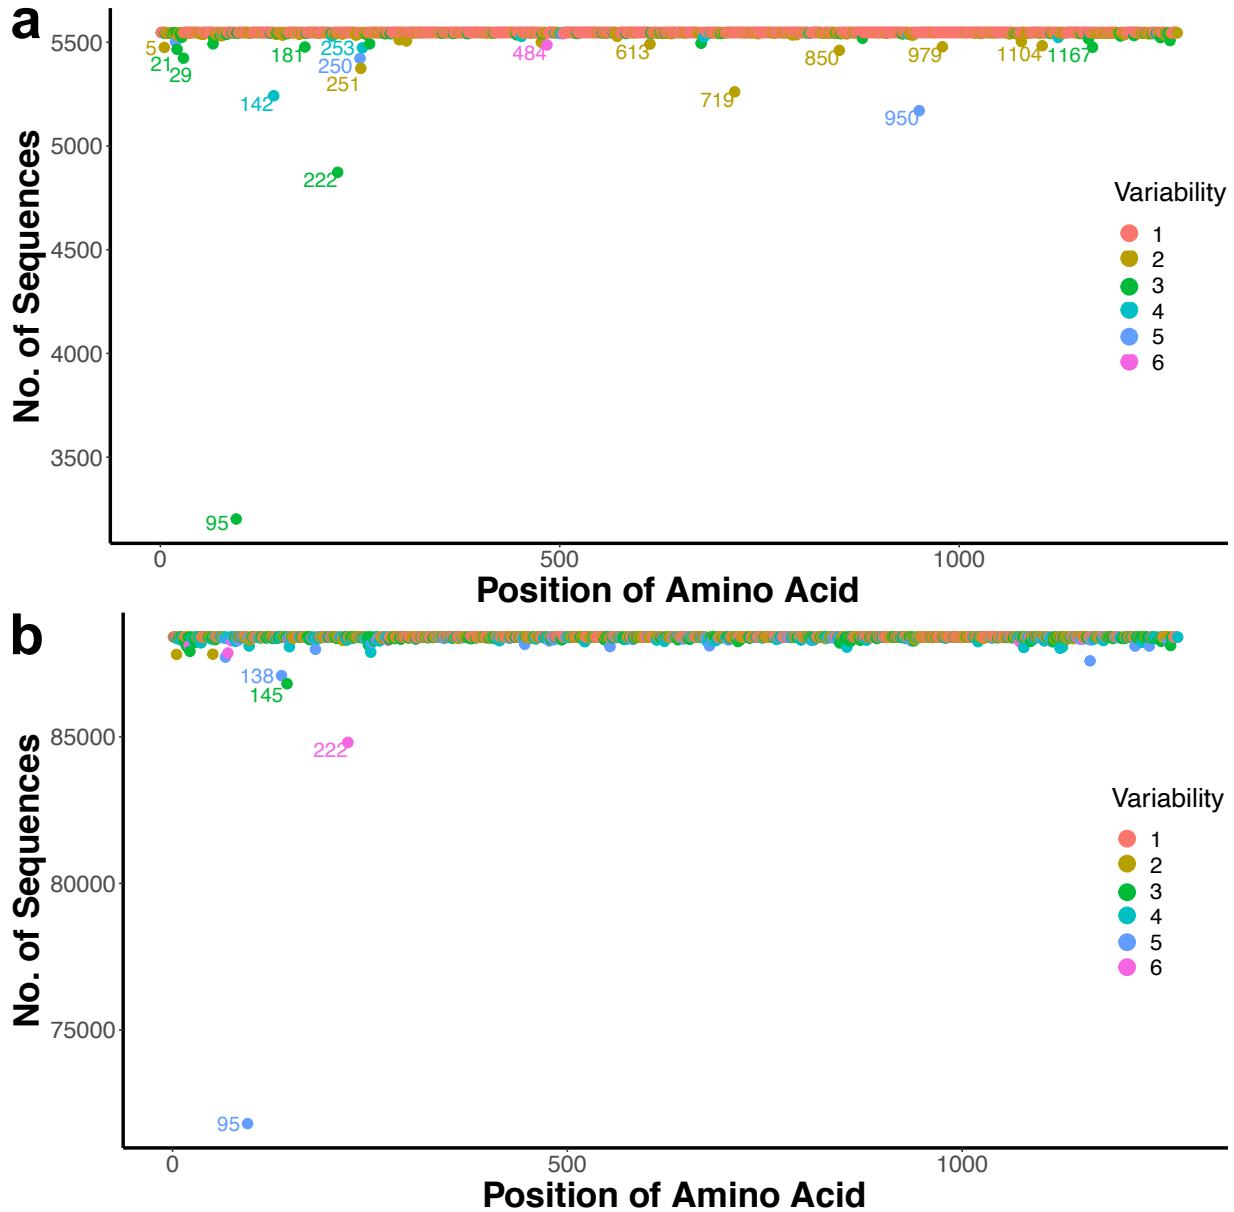

**Fig. S1 | Resolving sublineages of the delta variant at positions of mutations**

**a).** Revealing positions of mutations, from the ‘other’ group in Fig. 1a. The delta variant deletion mutations at positions 156 and 157 were used as conserved markers. Positions 95, 142, 222, 719 and, 950 were revealed as the main hotspot sites for mutations. The total number of sequences were  $n = 5547$ . Out of these, 5242 and 370 sequences had \*reverse mutations at positions \*G142D and \*N950D respectively. The rest of the mutations in all the sequences within the ‘other’ delta group were the typical mutations of the delta variant. **b).** Position of mutations in the delta variant sequences called using all the key marker mutations present in the parental delta variant. Positions 95, 138, 145, and 222 were also observed to be selective pressures for mutations. The total number of sequences were  $n = 88418$ . Variability is as was defined in Fig. 1b.

194

195

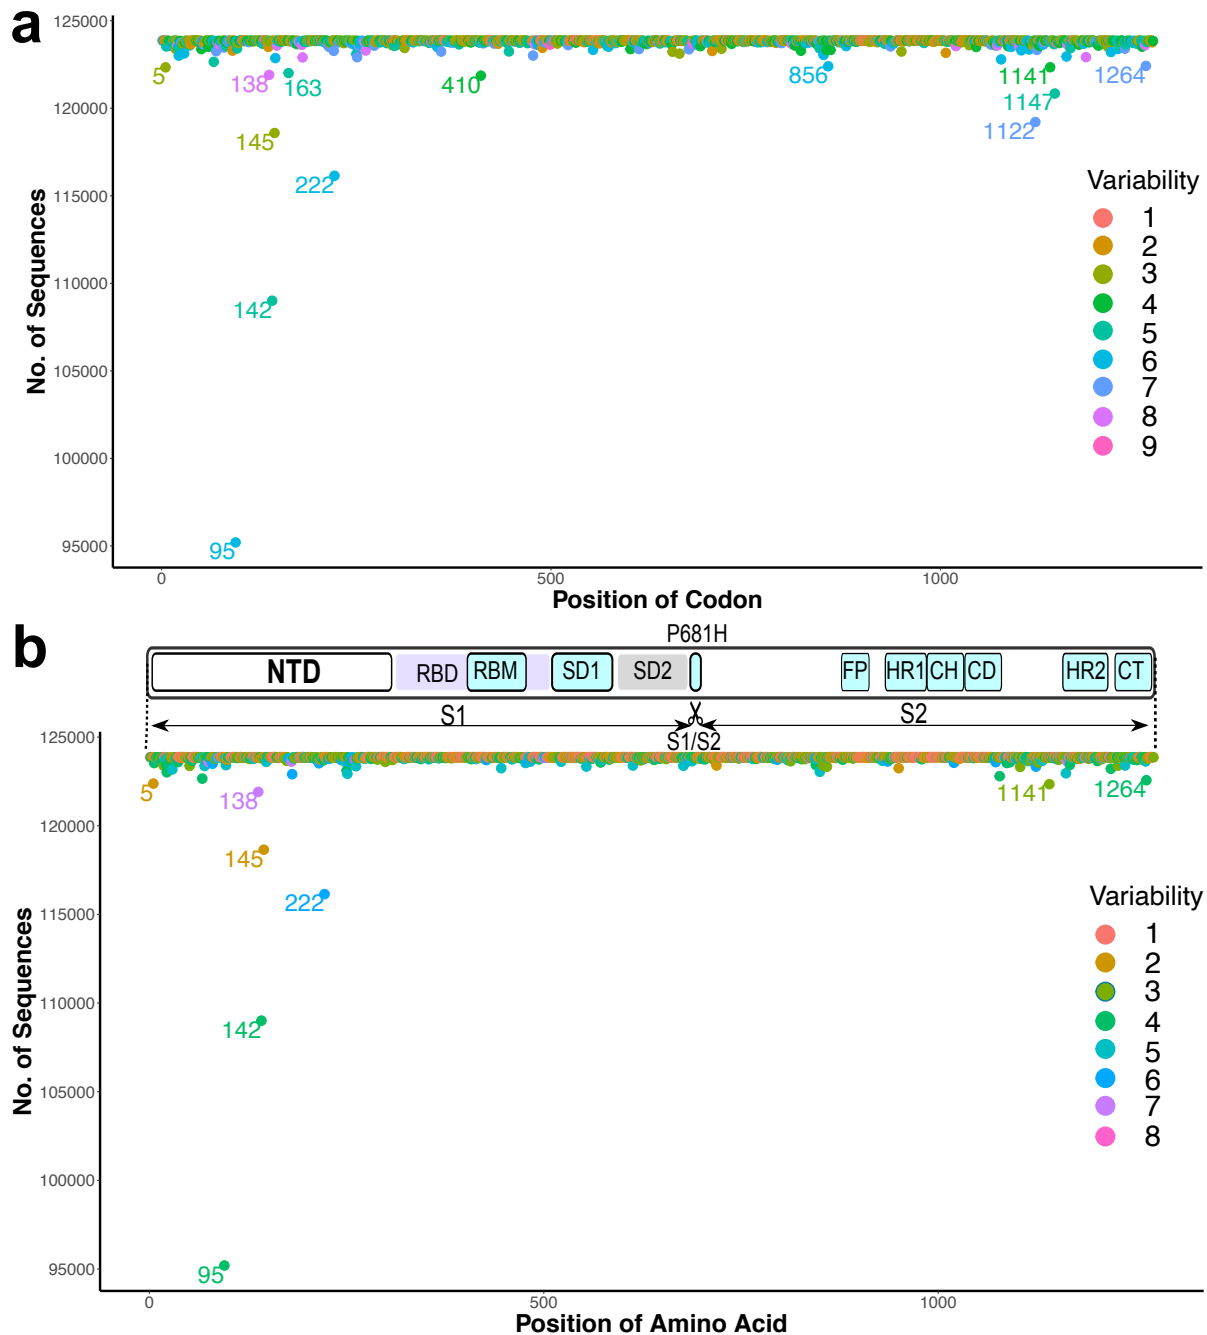

**Fig. S2 | Synonymous and non-synonymous mutations in the delta sublineages**

**a).** Revealing positions of mutations at codon level, from the sequence batch submitted from 2021.08.31 to 2021.09.30. Positions 163, 410, 856, 1122 and 1147 are synonymous mutations. The rest of the labelled positions were non-synonymous mutations, which included position 5. **b).** Non-synonymous mutations cluster at the NTD. The total number of the delta sequences were  $n = 123867$ . The inset on top shows a schematic representation of spike protein showing domains (Lan et al., 2020) and approximate positions in the graph: N-terminal domain; NTD, receptor binding domain; RBD, receptor binding motif; RBM, subdomain 1; SD1, subdomain 2; SD2, fusion peptide; FP, heptad repeat 1; HR1, central helix; CH, connector domain; CD, heptad repeat 1; heptad repeat 2; HR2, cytoplasmic tail; CT. Variability is as was defined before.

196

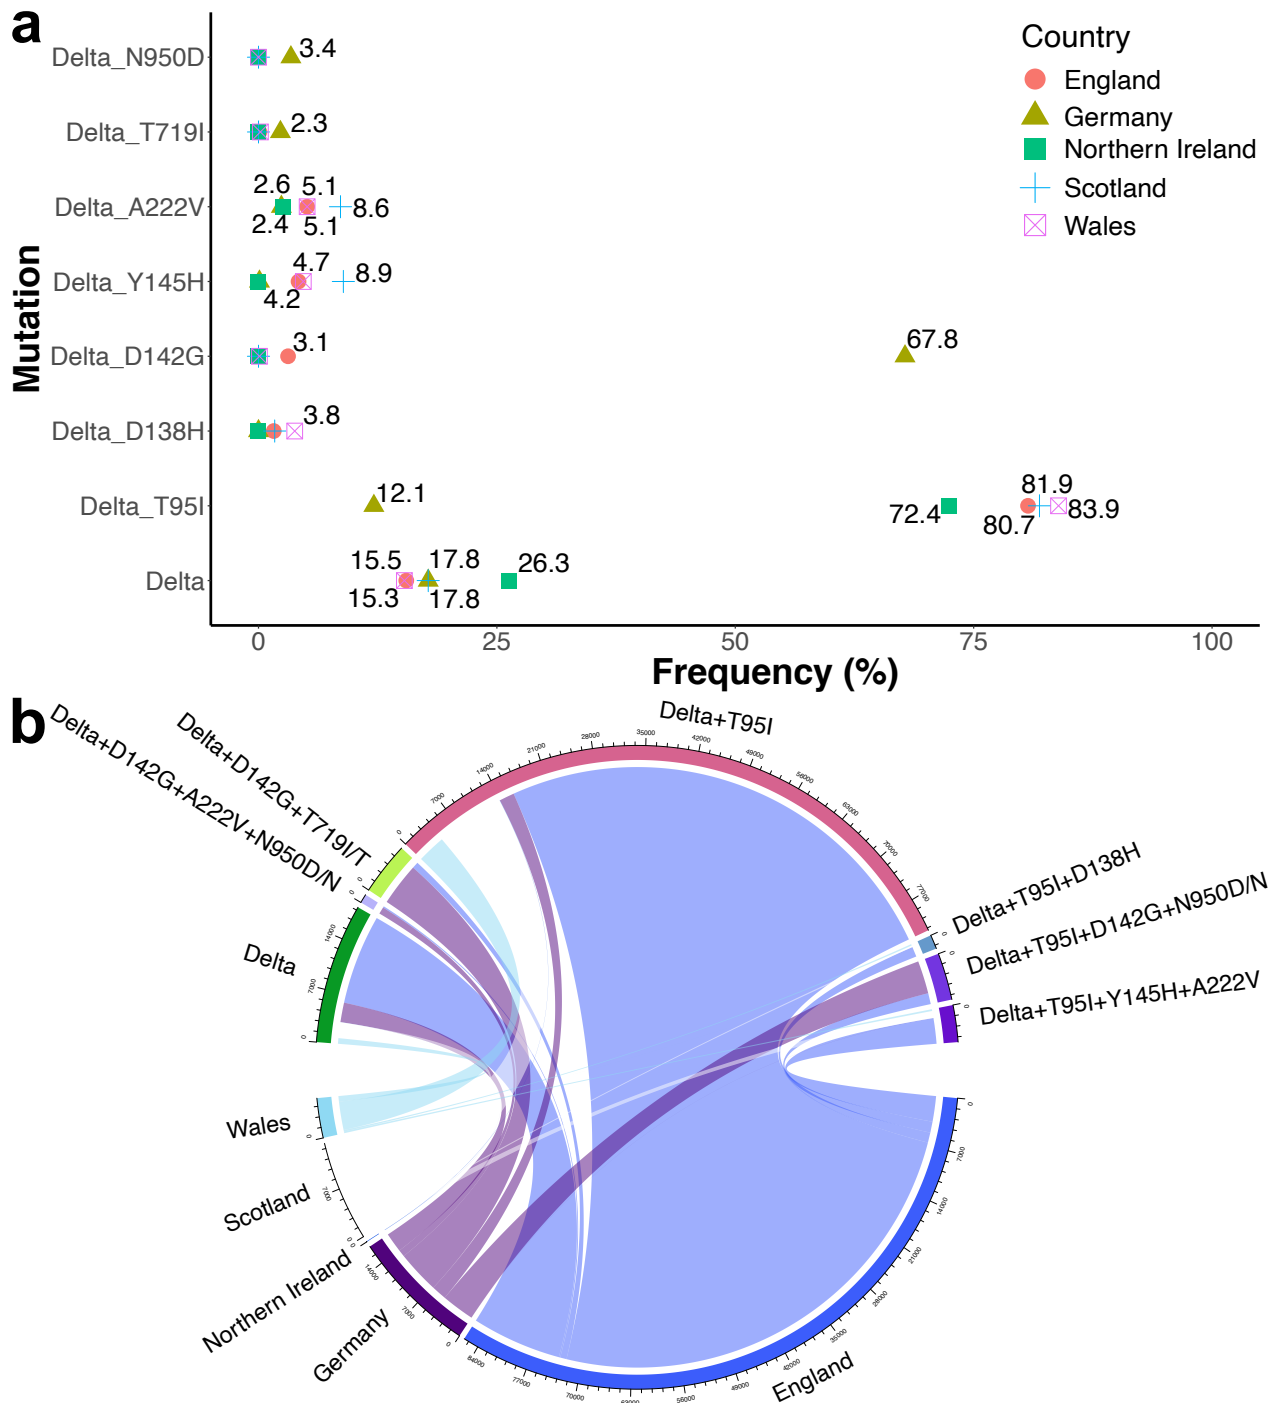

**Fig. S3 | Distributions of single and clusters of mutations**

**a)** Frequencies of single delta mutations from the sequence batch from 2021.08.31 to 2021.09.30. Sample sizes are as listed in Fig. 3b. **b)** Frequencies of cluster of mutations from the sequence submission batch of from 2021.08.31 to 2021.09.30. Sample sizes are as listed in Fig. 3b. Frequencies were calculated relative to the total (N) number of sequences.

197

**Table S1.** Amino acid mutations in all coding sequences of 6 groups of delta sublineages

| Protein<br>(Length) | Delta key<br>mutations | Delta<br>(16.5%)<br>n = 15324 | Delta2<br>+T95I<br>(81.2%)<br>n = 75307 | Delta3<br>+D142G<br>(6%)<br>n = 5508 | Delta4<br>+A222V<br>(4%)<br>n = 3749 | Delta5<br>+Y145H<br>(1.8%)<br>n = 1664 | Delta6<br>+D138H<br>(1.4%)<br>n = 1314 |
|---------------------|------------------------|-------------------------------|-----------------------------------------|--------------------------------------|--------------------------------------|----------------------------------------|----------------------------------------|
| Spike<br>(1271)     | T19R                   | T19R                          | T19R                                    | T19R                                 | T19R                                 | T19R                                   | T19R                                   |
|                     | G142D                  | G142D                         | G142D                                   | D142G                                | G142D                                | G142D                                  | G142D                                  |
|                     | *E156-                 | E156-                         | E156-                                   | E156-                                | E156-                                | E156-                                  | E156-                                  |
|                     | *F157-                 | F157-                         | F157-                                   | F157-                                | F157-                                | F157-                                  | F157-                                  |
|                     | *R158G                 | R158G                         | R158G                                   | R158G                                | R158G                                | R158G                                  | R158G                                  |
|                     | L452R                  | L452R                         | L452R                                   | L452R                                | L452R                                | L452R                                  | L452R                                  |
|                     | T478K                  | T478K                         | T478K                                   | T478K                                | T478K                                | T478K                                  | T478K                                  |
|                     | G142D                  | D614G                         | D614G                                   | D614G                                | D614G                                | D614G                                  | D614G                                  |
|                     | *E156-                 | P681R                         | P681R                                   | P681R                                | P681R                                | P681R                                  | P681R                                  |
|                     | *F157-                 | D950N                         | D950N                                   | D950N/D                              | D950N                                | D950N                                  | D950N                                  |
|                     | *R158G                 | T22T/I                        | T95I                                    | T29T/A                               | A222V                                | Y145H                                  | D138H                                  |
|                     | L452R                  | P251P/L                       | D138D/H                                 | T95T/I                               | V36V/F                               | T95I                                   | T95I                                   |
|                     | T478K                  | D1127D/G                      | Y145Y/H                                 | A222A/V                              | T95T/I                               | A222V                                  | L5L/F                                  |
|                     | D614G                  | A67A/V                        | A222A/V                                 | T250T/I                              | Y145Y/H                              | V36V/F                                 | A522A/S                                |
|                     | P681R                  | I1115I/V                      | P1162P/S                                | P251P/L                              | V1264V/L                             | L5L/F                                  | T827T/I                                |
|                     | D950N                  | G1219G/V                      |                                         | T719T/I                              | L5L/F                                | V1264V/L                               | I1114I/T                               |
|                     |                        |                               |                                         | L5L/F                                | R21R/T                               |                                        | T29T/A                                 |
|                     |                        |                               | R21R/T                                  | D253D/A                              |                                      | T547T/I                                |                                        |
|                     |                        |                               | H66H/Y                                  | D979D/E                              |                                      | T1120T/I                               |                                        |
|                     |                        |                               | G181G/V                                 |                                      |                                      | G1124G/V                               |                                        |
|                     |                        |                               | D253D/A                                 |                                      |                                      |                                        |                                        |
|                     |                        |                               | I850I/L                                 |                                      |                                      |                                        |                                        |
|                     |                        |                               | D979D/E                                 |                                      |                                      |                                        |                                        |
|                     |                        |                               | G1167G/V                                |                                      |                                      |                                        |                                        |
| Orf1ab<br>(7096)    |                        | P4715L                        | P4715L                                  | P4715L                               | P4715L                               | P4715L                                 | P4715L                                 |
|                     |                        | P5401L                        | P5401L                                  | P5401L                               | P5401L                               | P5401L                                 | P5401L                                 |
|                     |                        | G5063S                        | G5063S                                  | G5063S                               | G5063S                               | G5063S                                 | G5063S                                 |
|                     |                        | A1306S                        | A1306S                                  | A1306S                               | A1306A/S                             | A1306S                                 | A1306S                                 |
|                     |                        | P2046L                        | P2046L                                  | P2046L                               | P1640L                               | P2046L                                 | P2046L                                 |
|                     |                        | P2287S                        | P2287S                                  | P2287S                               | P2046P/L                             | P2287S                                 | P2287S                                 |
|                     |                        | V2930L                        | V2930L                                  | V2930L                               | P2287P/S                             | A2529V                                 | A2529V                                 |
|                     |                        | T3255I                        | T3255I                                  | T3255I                               | A2529A/V                             | V2930L                                 | V2930L                                 |
|                     |                        | T3646A                        | T3646A                                  | T3646A                               | V2930V/L                             | T3255I                                 | T3255I                                 |
|                     |                        | A6319V                        | A6319V                                  | A6319V                               | A3209V                               | T3646A                                 | T3646A                                 |
|                     |                        | E87E/D                        | A2529V                                  | E87E/D                               | V3718A                               | A6319V                                 | A6319V                                 |
|                     | P4715L                 | K261K/N                       | V665V/I                                 | K261K/N                              | T3750I                               | M5900M/I                               | I695I/V                                |
|                     | P5401L                 | D691D/N                       | G661G/S                                 | P309P/L                              | A6319A                               | R7014R/N                               | T1168T/I                               |
|                     | G5063S                 | L5230L/I                      | T814T/I                                 | V665V/I                              | T708T/I                              |                                        | S1520S/F                               |
|                     |                        | E5689E/D                      | E1909E/A                                | P1640P/L                             | T2906T/I                             |                                        | Y1859Y/H                               |
|                     |                        |                               | S2048S/F                                | E1724E/D                             | T3255T/A                             |                                        | L2329L/F                               |
|                     |                        |                               | V2766V/F                                | A2529A/V                             | Y3502Y/C                             |                                        | A3392A/V                               |
|                     |                        | L3606L/F                      | A3209A/V                                | T3646T/A                             |                                      | L3606L/F                               |                                        |
|                     |                        | H5005H/Y                      | L3606L/F                                | T4161T/I                             |                                      | V3690V/L                               |                                        |
|                     |                        | D5271D/N/Y                    | V3718V/A                                | R4589R/Q                             |                                      | K3832K/T                               |                                        |
|                     |                        |                               | T3750T/I                                | T5941T/I                             |                                      | P4624P/S                               |                                        |
|                     |                        |                               | R4589R/Q                                | D6249D/Y                             |                                      |                                        |                                        |
|                     |                        |                               | D5216D/Y                                | R7014R/N                             |                                      |                                        |                                        |
|                     |                        |                               | L5230L/I                                |                                      |                                      |                                        |                                        |
|                     |                        |                               | T5941T/I                                |                                      |                                      |                                        |                                        |
|                     |                        |                               | K6958K/R                                |                                      |                                      |                                        |                                        |
| ORF3a<br>(275)      |                        | S26L                          | S26L                                    | S26L                                 | S26L                                 | S26L                                   | S26L                                   |
|                     | S26L                   | A99A/V                        | K235K/T                                 | K16K/T                               | A23A/S                               |                                        | K16K/N                                 |
|                     |                        | S180S/F                       |                                         | D27D/Y                               | L83L/F                               |                                        | K66K/I                                 |
|                     |                        |                               |                                         | V88V/L                               | S171S/L                              |                                        |                                        |
|                     |                        |                               |                                         | K235K/T                              |                                      |                                        |                                        |

**Table S1.** Amino acid mutations in all coding sequences of 6 groups of delta sublineages

| Protein<br>(Length)             | Delta key<br>mutations | Delta<br>(16.5%)<br>n = 15324                                                                  | Delta2<br>+T95I<br>(81.2%)<br>n = 75307 | Delta3<br>+D142G<br>(6%)<br>n = 5508                                                 | Delta4<br>+A222V<br>(4%)<br>n = 3749                               | Delta5<br>+Y145H<br>(1.8%)<br>n = 1664               | Delta6<br>+D138H<br>(1.4%)<br>n = 1314     |
|---------------------------------|------------------------|------------------------------------------------------------------------------------------------|-----------------------------------------|--------------------------------------------------------------------------------------|--------------------------------------------------------------------|------------------------------------------------------|--------------------------------------------|
| E<br>(75)                       | -                      | -                                                                                              | -                                       | V58F                                                                                 | -                                                                  | -                                                    | -                                          |
| M<br>(222)                      | I82T                   | I82T                                                                                           | I82T                                    | I82T                                                                                 | I82T<br>A2A/S                                                      | I82T                                                 | I82T                                       |
| Orf6<br>(61)                    | -                      | -                                                                                              | -                                       | -                                                                                    | -                                                                  | -                                                    | -                                          |
| Orf7a<br>(121)                  | V82A<br>T120I          | V82A<br>T120I<br>V24V/F<br>P45P/L<br>C58C/F<br>A79A/D<br>L116L/F                               | V82A<br>T120I<br>H73H/Y                 | V82A<br>T120I<br>P45P/L<br>L116L/F<br>R118R/G                                        | V82A<br>T120I<br>L112L/I                                           | V82A<br>T120I                                        | V82A<br>T120I<br>G38G/E                    |
| Orf7b<br>(43)                   |                        | T40I<br>H42H/S<br>A43A/P                                                                       | T40I                                    | T40I/T                                                                               | T40T/I                                                             | T40I                                                 | T40I                                       |
| Orf8<br>(121)<br>(120)<br>(119) | D119-<br>F120-         | D119I<br>F120stop<br>I121T<br>V33V/F<br>A65A/S                                                 | D119I<br>F120stop<br>I121T<br>S67S/F    | D119I<br>F120stop<br>I121T<br>A65A/S<br>R115R/C                                      | D119I<br>F120stop<br>I121T                                         | D119I<br>F120stop<br>I121T                           | D119I<br>F120stop<br>I121T                 |
| N<br>(419)                      | D63G<br>R203M<br>D377Y | D63G<br>R203M<br>D377Y<br>G215C<br>Q9Q/L<br>S327S/L<br>G96G/C<br>G238G/C<br>P383P/S<br>D402D/Y | D63G<br>R203M<br>D377Y<br>G215C         | D63G<br>R203M<br>D377Y<br>G215C<br>Q9Q/L<br>R209R/I<br>M210M/E<br>S327S/L<br>W330W/L | D63G<br>R203M<br>D377Y<br>G215G/C<br>S202S/I<br>R209R/I<br>M210M/S | D63G<br>R203M<br>D377Y<br>G215C<br>A55A/S<br>S202S/I | D63G<br>R203M<br>D377Y<br>G215C<br>S327S/L |
| Orf10<br>(38)                   | -                      | -                                                                                              | L16L/P                                  | T38T/I                                                                               | -                                                                  | T38T/I                                               | -                                          |

Bright green colour highlights fixed mutations. Turquoise colour highlights new substitutions undergoing fixation. Grey colour shows emerging reverse-mutations. Yellow colour represents mutations that have significantly increased in frequencies. The rest substitutions (not highlighted) are candidates for future genomic surveillance. Cut off for highlighting was placed at >1% prevalence, that is, more than 1 sequence in every 100 sequences sharing same mutation per site. '/' for example, in T22T/I, means that the site has two amino acids, but in this case, there are more 'T's than 'I's. \*These three positions can also be captured in these two ways: Either as deletions at F157- and R158-, and substitution at E156G or deletions at E156- and R158-, and substitution at F157G. In all three cases, the final markers that define an unaligned delta variant sequence at these positions are 156G and 157V, and therefore they have no effect on variant calling.

198

199

200 **Table S2.** Resolving the genome sequences into clusters of haplotypes in each delta lineage

| Order of<br>haplotype<br>dominance | Frequency of Spike delta haplotypes per mutation |                 |                  |                  |                  |                  |                  |                  |
|------------------------------------|--------------------------------------------------|-----------------|------------------|------------------|------------------|------------------|------------------|------------------|
|                                    | Delta                                            | Delta +<br>T95I | Delta +<br>D138H | Delta +<br>D142G | Delta +<br>Y145H | Delta +<br>A222V | Delta +<br>T719I | Delta +<br>N950D |
| 1 <sup>st</sup>                    | 215                                              | 401             | 36               | 54               | 188              | 188              | 54               | 2                |
| 2 <sup>nd</sup>                    | 123                                              | 188             | 34               | 37               | 33               | 33               | 16               | 1                |
| 3 <sup>rd</sup>                    | 102                                              | 187             | 30               | 25               | 24               | 28               | 4                | 1                |
| 4 <sup>th</sup>                    | 96                                               | 146             | 21               | 21               | 21               | 28               | 3                | 1                |
| 5 <sup>th</sup>                    | 87                                               | 131             | 20               | 20               | 21               | 24               | 3                | NA               |
| 6 <sup>th</sup>                    | 67                                               | 127             | 16               | 18               | 18               | 23               | 3                | NA               |
| 7 <sup>th</sup>                    | 63                                               | 122             | 13               | 18               | 15               | 21               | 2                | NA               |
| 8 <sup>th</sup>                    | 52                                               | 103             | 10               | 16               | 14               | 21               | 2                | NA               |
| 9 <sup>th</sup>                    | 47                                               | 84              | 10               | 15               | 14               | 18               | 2                | NA               |
| 10 <sup>th</sup>                   | 41                                               | 83              | 10               | 13               | 9                | 16               | 1                | NA               |

201

202 **References for Methods**

203 Arendt, A. D. and C. (2020). *Read, Write, Format Excel 2007 and Excel 97/2000/XP/2003 Files.*

204 *R package version 0.6.5.*

205 Erik, S. (2016). Using DECIPHER v2.0 to Analyze Big Biological Sequence Data in R. *The R*

206 *Journal*, 8, 352. <https://doi.org/10.32614/RJ-2016-025>

207 Gagolewski, M. (2021). *stringi: Fast and portable character string processing in R\_*. *R package*

208 *version 1.7.4.* <https://stringi.gagolewski.com/>

209 GISAID. (2021). *GISAID.* <https://www.gisaid.org/>

210 GOV.UK. (2021). *Investigation of SARS-CoV-2 variants of concern: technical briefings.*

211 [https://www.gov.uk/government/publications/investigation-of-novel-sars-cov-2-variant-](https://www.gov.uk/government/publications/investigation-of-novel-sars-cov-2-variant-variant-of-concern-20201201)

212 [variant-of-concern-20201201](https://www.gov.uk/government/publications/investigation-of-novel-sars-cov-2-variant-variant-of-concern-20201201)

213 Gu, Z., Gu, L., Eils, R., Schlesner, M., & Brors, B. (2014). circlize implements and enhances

214 circular visualization in R. *Bioinformatics*, 30(19), 2811–2812.

215 <https://doi.org/10.1093/bioinformatics/btu393>

216 H. Pagès, P. Aboyoun, R. G. and S. D. (2021). *Biostrings: Efficient manipulation of biological*

217 *strings. R package version 2.60.2.*

218 H, W. (2016). *ggplot2: Elegant Graphics for Data Analysis.* Springer-Verlag New York, 2016.

219 *Springer-Verlag New York.*

220 Hadley Wickham, Romain François, L., & Henry, K. M. (2021). *dplyr: A Grammar of Data*

221 *Manipulation. R package version 1.0.7.*

222 Lan, J., Ge, J., Yu, J., Shan, S., Zhou, H., Fan, S., Zhang, Q., Shi, X., Wang, Q., Zhang, L., &

223 Wang, X. (2020). Structure of the SARS-CoV-2 spike receptor-binding domain bound to the

224 ACE2 receptor. *Nature*, 581(7807), 215–220. <https://doi.org/10.1038/S41586-020-2180-5>

- 225 Minh, B. Q., Schmidt, H. A., Chernomor, O., Schrempf, D., Woodhams, M. D., von Haeseler, A.,  
226 & Lanfear, R. (2020). IQ-TREE 2: New Models and Efficient Methods for Phylogenetic  
227 Inference in the Genomic Era. *Molecular Biology and Evolution*, 37(5), 1530–1534.  
228 <https://doi.org/10.1093/molbev/msaa015>
- 229 Morgan, M., Anders, S., Lawrence, M., Aboyoun, P., Pagès, H., & Gentleman, R. (2009).  
230 ShortRead: a bioconductor package for input, quality assessment and exploration of high-  
231 throughput sequence data. *Bioinformatics*, 25(19), 2607–2608.  
232 <https://doi.org/10.1093/bioinformatics/btp450>
- 233 NCBI. (2021). *NCBI*. <https://www.ncbi.nlm.nih.gov/>
- 234 Project, I. (2021). *Inkscape*. <https://inkscape.org>
- 235 RKI. (2021). *MF 2: Genome Sequencing and Genomic Epidemiology*.  
236 [https://www.rki.de/EN/Content/Institute/DepartmentsUnits/MF/MF2/mf2\\_node.html](https://www.rki.de/EN/Content/Institute/DepartmentsUnits/MF/MF2/mf2_node.html)
- 237 Saito, A., Nasser, H., Uriu, K., Kosugi, Y., Irie, T., Shirakawa, K., Sadamasu, K., Kimura, I., Ito,  
238 J., Wu, J., Ozono, S., Tokunaga, K., Butlertanaka, E. P., Tanaka, Y. L., Shimizu, R., Shimizu,  
239 K., Fukuhara, T., Kawabata, R., Sakaguchi, T., ... Sato, K. (2021). SARS-CoV-2 spike  
240 P681R mutation enhances and accelerates viral fusion. *BioRxiv*, 2021.06.17.448820.  
241 <https://doi.org/10.1101/2021.06.17.448820>
- 242 Srinivasan, M. D. and A. (2021). *data.table: Extension of `data.frame`*. *R package version 1.14.0*.  
243 <https://cran.r-project.org/package=data.table%0D>
- 244 Team, R. C. (2021). *R: A language and environment for statistical computing*. R Foundation for  
245 Statistical Computing, Vienna, Austria.
- 246 Wickham, H. (2007). Reshaping Data with the reshape Package. *Journal of Statistical Software*,  
247 21(12 SE-Articles), 1–20. <https://doi.org/10.18637/jss.v021.i12>
- 248 Wickham, H. (2021). *tidyr: Tidy Messy Data*. *R package version 1.1.3*.
- 249 Wickham, H., Averick, M., Bryan, J., Chang, W., McGowan, L., François, R., Golemund, G.,  
250 Hayes, A., Henry, L., Hester, J., Kuhn, M., Pedersen, T., Miller, E., Bache, S., Müller, K.,  
251 Ooms, J., Robinson, D., Seidel, D., Spinu, V., & Yutani, H. (2019). Welcome to the  
252 Tidyverse. *Journal of Open Source Software*, 4, 1686. <https://doi.org/10.21105/joss.01686>
- 253 Wu, F., Zhao, S., Yu, B., Chen, Y. M., Wang, W., Song, Z. G., Hu, Y., Tao, Z. W., Tian, J. H.,  
254 Pei, Y. Y., Yuan, M. L., Zhang, Y. L., Dai, F. H., Liu, Y., Wang, Q. M., Zheng, J. J., Xu, L.,  
255 Holmes, E. C., & Zhang, Y. Z. (2020). A new coronavirus associated with human respiratory  
256 disease in China. *Nature*, 579(7798), 265–269. <https://doi.org/10.1038/S41586-020-2008-3>
- 257 Yu, G. (2020). Using ggtree to Visualize Data on Tree-Like Structures. *Current Protocols in*  
258 *Bioinformatics*, 69. <https://doi.org/10.1002/cpbi.96>
